# Supplementary material for: Study on Chemical Constituents of Panax notoginseng Leaves
Source: MDPI journal article supplement (doi:10.3390/molecules28052194), 2023-02-27
Supplement: s1 [file s1]

**SUPPLEMENTARY MATERIAL**

**Study on Chemical Constituents of *Panax notoginseng* Leaves**

**Xiao-Juan Sun<sup>1</sup>, Hong-Bo Deng<sup>1</sup>, Teng-Yun Shu<sup>1</sup>, Li-Hua Su<sup>1</sup>, Min Xu<sup>1</sup>, Hai-Zhou Li<sup>1,\*</sup>**

<sup>1</sup> Center for Pharmaceutical Sciences, Faculty of Life Science and Technology,  
Kunming University of Science and Technology, Chenggong Campus, Kunming 650500, P. R.  
China

\* Correspondence: lihaizhou@kust.edu.cn

Tel: 86-871-65920253

|             | Content                                                                                      | Page |
|-------------|----------------------------------------------------------------------------------------------|------|
| Table S1.   | $^1\text{H}$ and $^{13}\text{C}$ NMR spectral data of <b>1</b>                               | 6    |
| Table S2.   | $^1\text{H}$ and $^{13}\text{C}$ NMR spectral data of <b>2</b>                               | 7    |
| Table S3.   | $^1\text{H}$ and $^{13}\text{C}$ NMR spectral data of <b>3</b>                               | 8    |
| Table S4.   | $^1\text{H}$ and $^{13}\text{C}$ NMR spectral data of <b>4</b>                               | 9    |
| Table S5.   | $^1\text{H}$ and $^{13}\text{C}$ NMR spectral data of <b>5</b>                               | 10   |
| Table S6.   | $^1\text{H}$ and $^{13}\text{C}$ NMR spectral data of <b>6</b>                               | 11   |
| Table S7.   | $^1\text{H}$ and $^{13}\text{C}$ NMR spectral data of <b>7</b>                               | 12   |
| Table S8.   | $^1\text{H}$ and $^{13}\text{C}$ NMR spectral data of <b>8</b>                               | 13   |
| Figure S1.  | HMBC correlations of <b>1</b> ( $\text{C}_5\text{D}_5\text{N}$ )                             | 1    |
| Figure S2.  | HMBC correlations of <b>2</b> ( $\text{C}_5\text{D}_5\text{N}$ )                             | 2    |
| Figure S3.  | HMBC correlations of <b>3</b> ( $\text{C}_5\text{D}_5\text{N}$ )                             | 2    |
| Figure S4.  | HMBC correlations of <b>4</b> ( $\text{C}_5\text{D}_5\text{N}$ )                             | 3    |
| Figure S5.  | HMBC correlations of <b>5</b> ( $\text{C}_5\text{D}_5\text{N}$ )                             | 3    |
| Figure S6.  | HMBC correlations of <b>6</b> ( $\text{C}_5\text{D}_5\text{N}$ )                             | 4    |
| Figure S7.  | HMBC correlations of <b>7</b> ( $\text{C}_5\text{D}_5\text{N}$ )                             | 5    |
| Figure S8.  | HMBC correlations of <b>8</b> ( $\text{C}_5\text{D}_5\text{N}$ )                             | 5    |
| Figure S9.  | IR spectrum of <b>1</b>                                                                      | 14   |
| Figure S10. | UV spectrum of <b>1</b>                                                                      | 14   |
| Figure S11. | HRESI spectrum of <b>1</b>                                                                   | 15   |
| Figure S12. | $[\alpha]^{23}_{\text{D}}$ of <b>1</b>                                                       | 15   |
| Figure S13. | $^1\text{H}$ NMR spectrum of <b>1</b> in $\text{C}_5\text{D}_5\text{N}$ at 298K (600 MHz)    | 16   |
| Figure S14. | $^{13}\text{C}$ NMR spectrum of <b>1</b> in $\text{C}_5\text{D}_5\text{N}$ at 298K (150 MHz) | 16   |
| Figure S15. | HSQC spectrum of <b>1</b> in $\text{C}_5\text{D}_5\text{N}$ at 298K                          | 17   |
| Figure S16. | HMBC spectrum of <b>1</b> in $\text{C}_5\text{D}_5\text{N}$ at 298K                          | 17   |
| Figure S17. | IR spectrum of <b>2</b>                                                                      | 18   |
| Figure S18. | UV spectrum of <b>2</b>                                                                      | 18   |
| Figure S19. | HRESI spectrum of <b>2</b>                                                                   | 19   |
| Figure S20. | $[\alpha]^{23}_{\text{D}}$ of <b>2</b>                                                       | 19   |
| Figure S21. | $^1\text{H}$ NMR spectrum of <b>2</b> in $\text{C}_5\text{D}_5\text{N}$ at 298K (600 MHz)    | 20   |
| Figure S22. | $^{13}\text{C}$ NMR spectrum of <b>2</b> in $\text{C}_5\text{D}_5\text{N}$ at 298K (150 MHz) | 20   |
| Figure S23. | HSQC spectrum of <b>2</b> in $\text{C}_5\text{D}_5\text{N}$ at 298K                          | 21   |
| Figure S24. | HMBC spectrum of <b>2</b> in $\text{C}_5\text{D}_5\text{N}$ at 298K                          | 21   |
| Figure S25. | IR spectrum of <b>3</b>                                                                      | 22   |
| Figure S26. | UV spectrum of <b>3</b>                                                                      | 22   |
| Figure S27. | HRESI spectrum of <b>3</b>                                                                   | 23   |
| Figure S28. | $[\alpha]^{23}_{\text{D}}$ of <b>3</b>                                                       | 23   |
| Figure S29. | $^1\text{H}$ NMR spectrum of <b>3</b> in $\text{C}_5\text{D}_5\text{N}$ at 298K (600 MHz)    | 24   |
| Figure S30. | $^{13}\text{C}$ NMR spectrum of <b>3</b> in $\text{C}_5\text{D}_5\text{N}$ at 298K (150 MHz) | 24   |
| Figure S31. | HSQC spectrum of <b>3</b> in $\text{C}_5\text{D}_5\text{N}$ at 298K                          | 25   |
| Figure S32. | HMBC spectrum of <b>3</b> in $\text{C}_5\text{D}_5\text{N}$ at 298K                          | 25   |

|             | Content                                                                                      | Page |
|-------------|----------------------------------------------------------------------------------------------|------|
| Figure S33. | IR spectrum of <b>4</b>                                                                      | 26   |
| Figure S34. | UV spectrum of <b>4</b>                                                                      | 26   |
| Figure S35. | HRESI spectrum of <b>4</b>                                                                   | 27   |
| Figure S36. | $[\alpha]^{23}_{\text{D}}$ of <b>4</b>                                                       | 27   |
| Figure S37. | $^1\text{H}$ NMR spectrum of <b>4</b> in $\text{C}_5\text{D}_5\text{N}$ at 298K (600 MHz)    | 28   |
| Figure S38. | $^{13}\text{C}$ NMR spectrum of <b>4</b> in $\text{C}_5\text{D}_5\text{N}$ at 298K (150 MHz) | 28   |
| Figure S39. | HSQC spectrum of <b>4</b> in $\text{C}_5\text{D}_5\text{N}$ at 298K                          | 29   |
| Figure S40. | HMBC spectrum of <b>4</b> in $\text{C}_5\text{D}_5\text{N}$ at 298K                          | 29   |
| Figure S41. | IR spectrum of <b>5</b>                                                                      | 30   |
| Figure S42. | UV spectrum of <b>5</b>                                                                      | 30   |
| Figure S43. | HRESI spectrum of <b>5</b>                                                                   | 31   |
| Figure S44. | $[\alpha]^{23}_{\text{D}}$ of <b>5</b>                                                       | 31   |
| Figure S45. | $^1\text{H}$ NMR spectrum of <b>5</b> in $\text{C}_5\text{D}_5\text{N}$ at 298K (600 MHz)    | 32   |
| Figure S46. | $^{13}\text{C}$ NMR spectrum of <b>5</b> in $\text{C}_5\text{D}_5\text{N}$ at 298K (150 MHz) | 32   |
| Figure S47. | HSQC spectrum of <b>5</b> in $\text{C}_5\text{D}_5\text{N}$ at 298K                          | 33   |
| Figure S48. | HMBC spectrum of <b>5</b> in $\text{C}_5\text{D}_5\text{N}$ at 298K                          | 33   |
| Figure S49. | IR spectrum of <b>6</b>                                                                      | 34   |
| Figure S50. | UV spectrum of <b>6</b>                                                                      | 34   |
| Figure S51. | HRESI spectrum of <b>6</b>                                                                   | 35   |
| Figure S52. | $[\alpha]^{23}_{\text{D}}$ of <b>6</b>                                                       | 35   |
| Figure S53. | $^1\text{H}$ NMR spectrum of <b>6</b> in $\text{C}_5\text{D}_5\text{N}$ at 298K (600 MHz)    | 36   |
| Figure S54. | $^{13}\text{C}$ NMR spectrum of <b>6</b> in $\text{C}_5\text{D}_5\text{N}$ at 298K (150 MHz) | 36   |
| Figure S55. | HSQC spectrum of <b>6</b> in $\text{C}_5\text{D}_5\text{N}$ at 298K                          | 37   |
| Figure S56. | HMBC spectrum of <b>6</b> in $\text{C}_5\text{D}_5\text{N}$ at 298K                          | 37   |
| Figure S57. | IR spectrum of <b>7</b>                                                                      | 38   |
| Figure S58. | UV spectrum of <b>7</b>                                                                      | 38   |
| Figure S59. | HRESI spectrum of <b>7</b>                                                                   | 39   |
| Figure S60. | $[\alpha]^{23}_{\text{D}}$ of <b>7</b>                                                       | 39   |
| Figure S61. | $^1\text{H}$ NMR spectrum of <b>7</b> in $\text{C}_5\text{D}_5\text{N}$ at 298K (600 MHz)    | 40   |
| Figure S62. | $^{13}\text{C}$ NMR spectrum of <b>7</b> in $\text{C}_5\text{D}_5\text{N}$ at 298K (150 MHz) | 40   |
| Figure S63. | HSQC spectrum of <b>7</b> in $\text{C}_5\text{D}_5\text{N}$ at 298K                          | 41   |
| Figure S64. | HMBC spectrum of <b>7</b> in $\text{C}_5\text{D}_5\text{N}$ at 298K                          | 41   |
| Figure S65. | IR spectrum of <b>8</b>                                                                      | 42   |
| Figure S66. | UV spectrum of <b>8</b>                                                                      | 42   |
| Figure S67. | HRESI spectrum of <b>8</b>                                                                   | 43   |
| Figure S68. | $[\alpha]^{23}_{\text{D}}$ of <b>8</b>                                                       | 43   |
| Figure S69. | $^1\text{H}$ NMR spectrum of <b>8</b> in $\text{C}_5\text{D}_5\text{N}$ at 298K (600 MHz)    | 44   |
| Figure S70. | $^{13}\text{C}$ NMR spectrum of <b>8</b> in $\text{C}_5\text{D}_5\text{N}$ at 298K (150 MHz) | 44   |
| Figure S71. | HSQC spectrum of <b>8</b> in $\text{C}_5\text{D}_5\text{N}$ at 298K                          | 45   |
| Figure S72. | HMBC spectrum of <b>8</b> in $\text{C}_5\text{D}_5\text{N}$ at 298K                          | 45   |

## Supplementary material

### Detailed structural elucidation of 1-8

The molecular formula of **1** was determined as  $C_{47}H_{82}O_{18}$  by (+)-HRMS-ESI spectrum at  $m/z$  957.5231  $[M + Na]^+$  (calcd. For.  $C_{47}H_{82}O_{18}Na$ : 957.5542), indicating for the the presence of seven double bonds equivalents (DBEs). The UV bonds at 192. The  $^1H$  NMR spectrum of **1** displayed signal for eight methyl protons. The  $^{13}C$ -NMR (Table S1.) revealed forty-seven carbons signals, including four characteristic signals ( $\delta_c$ : 88.6, 18.2, 70.2, 83.0). With the aid of HMBC spectra, the  $^1H$  and  $^{13}C$  NMR spectrum data of **1** was assigned (Table S1).

The presence of HMBC correlations between H<sub>2</sub>-23/H<sub>3</sub>-26/H<sub>3</sub>-27 and C-24, H<sub>3</sub>-26/H<sub>3</sub>-27 and C-25 indicated a hydroxyl was located at C-25. Besides, in its HMBC spectrum, Glc H-1' ( $\delta_H$ : 4.97) was correlated with C-3 ( $\delta_c$ : 88.6). Glc H-1'' ( $\delta_H$ : 5.12) was correlated with C-20 ( $\delta_c$ : 83.0), and Xyl H-1''' ( $\delta_H$ : 4.97) was correlated with C-6'' ( $\delta_c$ : 69.4), respectively (Figure S1). Glc H-1' was connected with C-3, and Glc C-6'' was connected with Xyl C-1''', finally Glc C-1'' was connected with C-20 indicating from above.

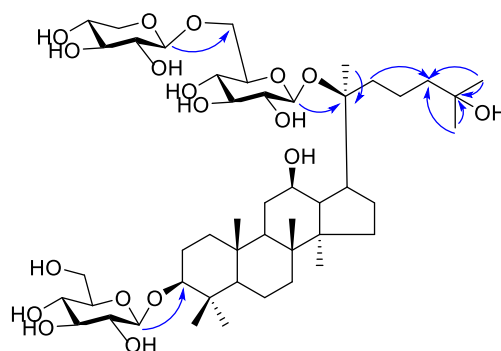

**Figure S1.** HMBC correlations of **1**

The molecular formula of **2** was deduced as  $C_{47}H_{80}O_{18}$  based on a quasi-ion peak at  $m/z$  955.5245  $[M + Na]^+$  (calcd. For.  $C_{47}H_{80}O_{18}Na$ : 955.5232) on its (+)-HRMS-ESI, indicating for the the presence of eight double bonds equivalents (DBEs). The  $^1H$  and  $^{13}C$  NMR spectrum data of **2** showed signals for seven methyl protons and forty-seven carbons, including four characteristic signals ( $\delta_c$ : 88.6, 18.2, 70.1, 83.2) (Table S2).

Besides, analysis of the HMBC spectra, the correlations between H<sub>3</sub>-27/H<sub>2</sub>-26/H<sub>1</sub>-24 and C-25, and  $\delta_H$  H<sub>2</sub>-22/H<sub>2</sub>-26/H<sub>3</sub>-27 and C-24 showed the existence of a double bond at C-25 and C-26 and a hydroxyl at C-24. In its HMBC spectrum, Glc H-1' ( $\delta_H$ : 4.97) was correlated with C-3 ( $\delta_c$ : 88.6). Glc H-1'' ( $\delta_H$ : 5.17) was correlated with C-20 ( $\delta_c$ : 83.2), and Ara(f) H-1''' ( $\delta_H$ : 4.69) was correlated with C-6'' ( $\delta_c$ : 68.3) (Figure S2), from which revealed Glc H-1' was connected with C-3, and Glc C-6'' was connected with Ara(f) H-1''', finally Glc C-1'' was connected with C-20.

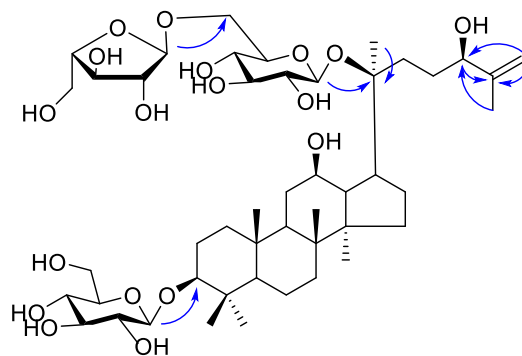

**Figure S2.** HMBC correlations of **2**

The molecular formula of **3** was determined as  $C_{47}H_{80}O_{19}$  based on a quasi-ion peak at  $m/z$  971.5247  $[M + Na]^+$  (calcd. For.  $C_{47}H_{80}O_{19}Na$ : 971.5242) on its (+)-HRMS-ESI, indicating for the presence of eight double bonds equivalents (DBEs). The  $^1H$  and  $^{13}C$  NMR spectrum data of **3** showed signals for seven methyl protons and forty-seven carbons signals, including three characteristic signals ( $\delta_C$ : 88.6, 18.2, 83.0) (Table S3).

The HMBC correlations from  $H_{2-26}/H_{3-27}$  to C-25, and  $H_{2-23}/H_{2-26}/H_{3-27}$  to C-24 verified that an alkene proton signal existed between C-25 and C-26. Furthermore, according to the analysis of its HMBC spectrum, Glc H-1' ( $\delta_H$ : 4.97) was correlated with C-3 ( $\delta_C$ : 88.6). Glc H-1'' ( $\delta_H$ : 5.12) was correlated with C-20 ( $\delta_C$ : 83.0), and Xyl H-1''' ( $\delta_H$ : 4.97) was correlated with C-6'' ( $\delta_C$ : 69.4) (Figure S3), from which indicated Glc H-1' was connected with C-3, and Glc C-6'' was connected with Xyl H-1''', finally Glc C-1'' was connected with C-20.

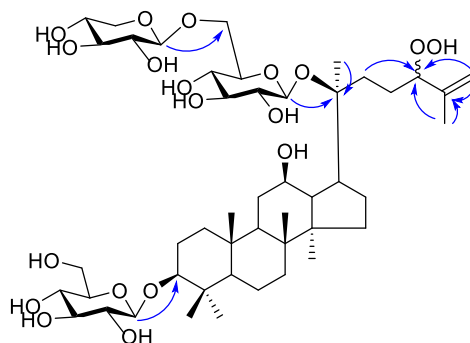

**Figure S3.** HMBC correlations of **3**

The molecular formula of **4** was determined as  $C_{47}H_{80}O_{18}$  based on a quasi-ion peak at  $m/z$  955.5247  $[M + Na]^+$  (calcd. For.  $C_{47}H_{80}O_{18}Na$ : 955.5641) on its (+)-HRMS-ESI, indicating for the presence of eight double bonds equivalents (DBEs). The  $^1H$  and  $^{13}C$  NMR spectrum data of **4** indicated signals for eight methyl protons and forty-seven carbons signals, including three characteristic signals ( $\delta_C$ : 89.2, 18.5, 83.8). With the aid of HMBC spectra, the  $^1H$  and  $^{13}C$  NMR spectramdata of **4** was assigned (Table S4).

In the HMBC spectrum, H-23/H-24/H<sub>3</sub>-26/H<sub>3</sub>-27 were correlated with C-25, and H<sub>2</sub>-22/H<sub>1</sub>-23/H<sub>3</sub>-26/H<sub>3</sub>-27 were correlated with C-24, indicating that an alkene proton signal existed between C-23 and C-24, and a hydroxyl at C-25. Besides, the HMBC correlations from Glc H-1' ( $\delta_{\text{H}}$ : 4.93) to C-3 ( $\delta_{\text{C}}$ : 89.2), Glc H-1'' ( $\delta_{\text{H}}$ : 5.14) to C-20 ( $\delta_{\text{C}}$ : 83.8), and Ara(p) H-1''' ( $\delta_{\text{H}}$ : 5.00) to Glc C-6'' ( $\delta_{\text{C}}$ : 69.1) (Figure S4) showed Glc H-1' was connected with C-3, and Glc C-6'' was connected with Ara(p) H-1''', finally Glc C-1'' was connected with C-20.

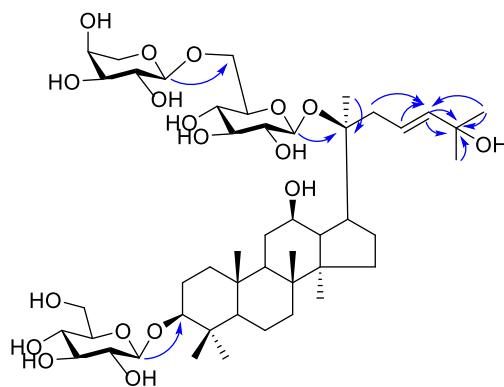

**Figure S4.** HMBC correlations of **4**

The molecular formula of **5** was deduced as C<sub>58</sub>H<sub>98</sub>O<sub>28</sub> based on a quasi-ion peak at  $m/z$  1265.6144 [M + Na]<sup>+</sup> (calcd. For. C<sub>58</sub>H<sub>98</sub>O<sub>28</sub>Na: 1265.6142) on its (+)-HRMS-ESI, indicating for the the presence of ten double bonds equivalents (DBEs). The <sup>1</sup>H and <sup>13</sup>C NMR spectrum data of **5** indicated signals for seven methyl protons and fifty-eight carbons signals, including four characteristic signals ( $\delta_{\text{C}}$ : 88.6, 18.2, 69.9 and 83.2) (Table S5).

In the HMBC spectrum, Glc H-1' ( $\delta_{\text{H}}$ : 4.95) was correlated with C-3 ( $\delta_{\text{C}}$ : 88.6), Glc H-1'' ( $\delta_{\text{H}}$ : 5.54) was correlated with Glc C-2' ( $\delta_{\text{C}}$ : 82.6), Xyl H-1''' ( $\delta_{\text{H}}$ : 5.44) was correlated with C-2'' ( $\delta_{\text{C}}$ : 84.2), Glc H-1'''' ( $\delta_{\text{H}}$ : 5.12) was correlated with C-20 ( $\delta_{\text{C}}$ : 83.0), and Xyl H-1''''' ( $\delta_{\text{H}}$ : 5.01) was correlated with Glc C-6'''' ( $\delta_{\text{C}}$ : 69.9) (shown in Fig 2.), respectively, from which indicated Glc C-1' was connected with C-3, Glc C-1'' was connected with Glc C-2', Glc C-1''' was connected with Xyl C-2'', and Glc C-1'''' was connected with C-20, finally Glc C-6'''' was connected with Xyl C-1'''''.

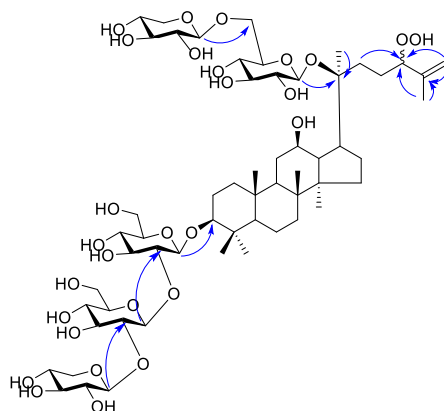

**Figure S5.** HMBC correlations of **5**

The molecular formula of **6** was determined as  $C_{58}H_{98}O_{28}$  based on a quasi-ion peak at  $m/z$  1265.6149  $[M + Na]^+$  (calcd. For.  $C_{58}H_{98}O_{28}Na$ : 1265.6142) on its (+)-HRMS-ESI, indicating for the the presence of ten double bonds equivalents (DBEs). The  $^1H$  and  $^{13}C$  NMR spectrum data of **6** indicated signals for eight methyl protons and fifty-eight carbons signals, including four characteristic signals ( $\delta_c$ : 88.6, 18.2, 70.2 and 83.0). With the aid of HMBC spectra, the  $^1H$  and  $^{13}C$  NMR spectrum data of **6** was assigned (Table S6).

As shown in its HMBC spectrum, H-26/H-27/H-24/H-23 were correlated with C-25, and H-27/H-26/H-23/H-22 were correlated with C-24, indicating that an alkene proton signal existed between C-23 and C-24, and a hydroxyperoxy existed at C-25. Besides, the HMBC correlations from Glc H-1' ( $\delta_H$ : 4.93) to C-3 ( $\delta_c$ : 89.2). Glc H-1'' ( $\delta_H$ : 5.14) to C-20 ( $\delta_c$ : 83.8), and Ara (p) H-1''' ( $\delta_H$ : 5.00) to Glc C-6'' ( $\delta_c$ : 69.1) (Figure S6), showed Glc H-1' was connected with C-3, and Glc C-6'' was connected with Ara(p) H-1''', finally Glc C-1'' was connected with C-20.

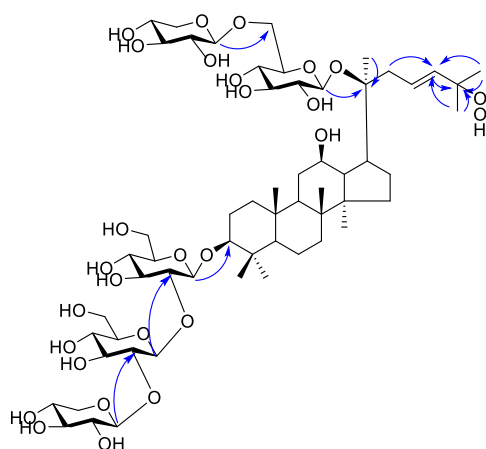

**Figure S6.** HMBC correlations of **6**

The molecular formula of **7** was deduced as  $C_{58}H_{98}O_{28}$  based on a quasi-ion peak at  $m/z$  1265.6146  $[M + Na]^+$  (calcd. For.  $C_{58}H_{98}O_{28}Na$ : 1265.6146) on its (+)-HRMS-ESI, revealing for the the presence of ten double bonds equivalents (DBEs). The  $^1H$  and  $^{13}C$ -NMR spectrum data of **7** indicated signals for eight methyl protons and fifty-eight carbons signals, including four characteristic signals ( $\delta_c$ : 88.6, 18.2, 70.5 and 83.5) (Table S7).

According to the HMBC spectrum, the correlations from H-26/H-27/H-24/H-23 to C-25, and H-27/H-26/H-23/H-22 to C-24 verified that an alkene proton signal existed between C-23 and C-24, and a hydroxyperoxy existed at C-25. Besides, Glc H-1' ( $\delta_H$ : 4.95) was correlated with C-3 ( $\delta_c$ : 88.6). Glc H-1'' ( $\delta_H$ : 5.52) was correlated with Glc C-2' ( $\delta_c$ : 82.7). Xyl H-1''' ( $\delta_H$ : 5.45) was correlated with Glc C-2'' ( $\delta_H$ : 84.2). Glc H-1'''' ( $\delta_H$ : 5.20) was correlated with C-20 ( $\delta_c$ : 83.3), and Ara (p) H-1'''' ( $\delta_H$ : 5.00) was correlated with Glc C-6''' ( $\delta_c$ : 68.7) (Figure S7), indicating Glc H-1' was connected with C-3, Glc C-1'' was correlated with Glc C-2', Glc C-1''' was connected with Xyl C-2'', and Glc C-1'''' was connected with C-20, finally Glc C-6'''' was connected with Ara (p) H-1'''' from above.

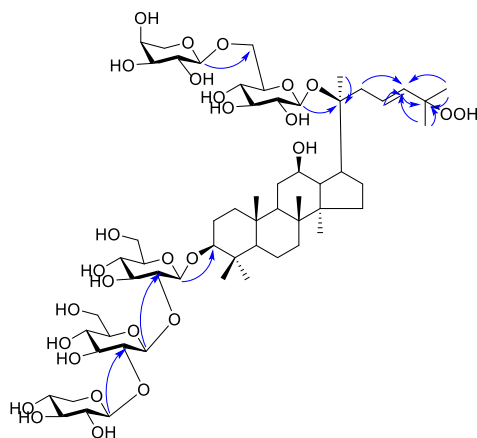

**Figure S7.** HMBC correlations of **7**

The molecular formula of **8** was determined as  $C_{58}H_{96}O_{26}$  based on a quasi-ion peak at  $m/z$  1232.4306  $[M + Na]^+$  (calcd. For.  $C_{58}H_{96}O_{26}Na$ : 1232.3532) on its (+)-HRMS-ESI, indicating for the the presence of ten double bonds equivalents (DBEs). The  $^1H$  and  $^{13}C$  NMR spectrum data of **8** indicated signals for eight methyl protons and fifty-eight carbons signals, including 28 carbons assigned to the sugar moiety and 30 to a triterpene moiety. With the aid of HMBC spectra, the  $^1H$  and  $^{13}C$  NMR spectrum data of **8** was assigned (Table S8).

As shown in its HMBC spectrum, H-22/H-23/H-26/H-27 was correlated with C-24, and H-25/H-26/H-27 was correlated with C-25 were correlated with C-24, indicating that an alkene proton signal existed between C-24 and C-25. Besides, in the HMBC, Glc H-1' ( $\delta_H$ : 4.96) was correlated with C-3 ( $\delta_C$ : 89.1). Glc H-1'' ( $\delta_H$ : 5.40) was correlated with Glc C-2' ( $\delta_C$ : 83.2), Xyl H-1''' ( $\delta_H$ : 5.44) was correlated with Glc C-2'' ( $\delta_H$ : 84.2), and Glc H-1'''' ( $\delta_H$ : 5.18) was correlated with C-20 ( $\delta_C$ : 83.3), and Ara (f) H-1'''' ( $\delta_H$ : 5.68) was correlated with Glc C-6''' ( $\delta_C$ : 67.29) (Figure S8), showed Glc C-1' was connected with C-3, Glc C-1'' was connected with Glc C-2', Glc C-1''' was connected with Xyl C-2'', and Glc C-1'''' was connected with C-20, finally Glc C-6''' was connected with Ara (f) C-1''''.

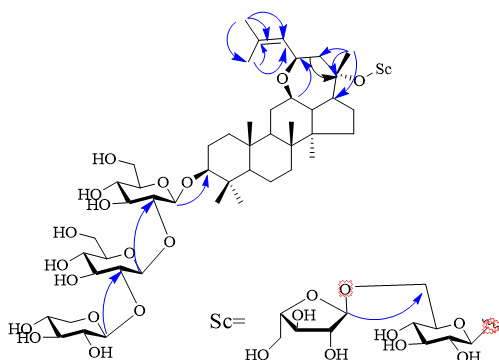

**Figure S8.** HMBC correlations of **8**



**Table S1.** <sup>1</sup>H and <sup>13</sup>C NMR spectral data of **1** (in C<sub>5</sub>D<sub>5</sub>N, *J* in Hz)

| No. | δ <sub>C</sub> | δ <sub>H</sub> ( <i>I</i> in Hz)              | No.      | δ <sub>C</sub> | δ <sub>H</sub> ( <i>I</i> in Hz)     |
|-----|----------------|-----------------------------------------------|----------|----------------|--------------------------------------|
| 1   | 38.9           | 0.73 m, 1.54 m                                | 3-O-Glc  |                |                                      |
| 2   | 26.5           | 1.80 m, 2.20 m                                | 1'       | 106.8          | 4.97 (d, <i>J</i> = 7.8 Hz)          |
| 3   | 88.6           | 3.43 (dd, <i>J</i> = 4.8, 10.8 Hz)            | 2'       | 75.6           | 4.08 m                               |
| 4   | 39.4           | /                                             | 3'       | 78.7           | 4.19 m                               |
| 5   | 56.1           | 0.70 (d, <i>J</i> = 11.4 Hz)                  | 4'       | 71.6           | 4.24 m                               |
| 6   | 18.2           | 1.34 m, 1.46 m                                | 5'       | 78.2           | 4.04 m                               |
| 7   | 34.8           | 1.46 m <sup>a</sup> , 1.18 (d, <i>J</i> = 9.6 | 6'       | 62.8           | 4.44 (dd, <i>J</i> = 6, 12 Hz)       |
| 8   | 39.7           | /                                             | 20-O-Glc |                |                                      |
| 9   | 49.8           | 1.36 m                                        | 1''      | 97.9           | 5.12 (d, <i>J</i> = 7.8 Hz)          |
| 10  | 37.3           | /                                             | 2''      | 74.8           | 3.93 m                               |
| 11  | 30.7           | 1.51 m <sup>a</sup> , 1.97 m <sup>a</sup>     | 3''      | 78.5           | 4.25 m                               |
| 12  | 70.2           | 3.65 m <sup>a</sup>                           | 4''      | 71.3           | 4.20 m                               |
| 13  | 49.4           | 2.00 m                                        | 5''      | 76.6           | 4.14 m                               |
| 14  | 51.2           | /                                             | 6''      | 69.4           | 4.31 m, 4.71 (d, <i>J</i> = 11.4 Hz) |
| 15  | 30.3           | 0.95 m, 1.83 m                                | -Xyl     |                |                                      |
| 16  | 26.1           | 1.30 m, 1.51 m                                | 1'''     | 105.5          | 4.97 (d, <i>J</i> = 7.2 Hz)          |
| 17  | 51.6           | 1.42 m                                        | 2'''     | 74.7           | 4.02 m <sup>a</sup>                  |
| 18  | 15.8           | 0.90 s                                        | 3'''     | 77.8           | 4.13 m <sup>a</sup>                  |
| 19  | 16.1           | 0.81 s                                        | 4'''     | 70.9           | 4.14 m <sup>a</sup>                  |
| 20  | 83.0           | /                                             | 5'''     | 66.8           | 3.96 (t, <i>J</i> = 10.2 Hz), 4.30 m |
| 21  | 23.6           | 1.61 s                                        |          |                |                                      |
| 22  | 39.8           | 2.80 (dd, <i>J</i> = 7.8, 13.8 Hz)            |          |                |                                      |
| 23  | 26.4           | 1.93 m, 2.45 m                                |          |                |                                      |
| 24  | 27.5           | 1.81 m, 2.05 m                                |          |                |                                      |
| 25  | 70.5           | /                                             |          |                |                                      |
| 26  | 24.8           | 1.59 s                                        |          |                |                                      |
| 27  | 25.2           | 1.53 s                                        |          |                |                                      |
| 28  | 25.9           | 1.30 s                                        |          |                |                                      |
| 29  | 16.6           | 0.99 s                                        |          |                |                                      |
| 30  | 17.0           | 1.00 s                                        |          |                |                                      |

a: Overlapped signals, s: singlet, d: doublet, t: triplet, m: multiplet, ': the first sugar, '': the second sugar, /: no hydrogen.

**Table S2.** <sup>1</sup>H and <sup>13</sup>C NMR spectral data of **2** (in C<sub>5</sub>D<sub>5</sub>N, *J* in Hz)

| No. | δ <sub>C</sub> | δ <sub>H</sub> ( <i>J</i> in Hz)           | No.   | δ <sub>C</sub> | δ <sub>H</sub> ( <i>J</i> in Hz)        |
|-----|----------------|--------------------------------------------|-------|----------------|-----------------------------------------|
| 1   | 38.9           | 0.76 m, 1.52 m                             | 3-O-  |                |                                         |
| 2   | 26.5           | 1.82 m, 2.28 m                             | 1'    | 106.8          | 4.97 (d, <i>J</i> = 7.8 Hz)             |
| 3   | 88.6           | 3.37 (dd, <i>J</i> = 4.8, 10.8 Hz)         | 2'    | 76.0           | 4.08 m                                  |
| 4   | 39.4           | /                                          | 3'    | 78.9           | 4.21 m                                  |
| 5   | 56.1           | 0.72 m                                     | 4'    | 71.8           | 3.99 m                                  |
| 6   | 18.2           | 1.36 m, 1.47 m                             | 5'    | 78.2           | 4.05 m                                  |
| 7   | 34.8           | 1.20 m, 1.48m                              | 6'    | 62.8           | 4.44 (dd, <i>J</i> = 4.8, 10.8 Hz)      |
| 8   | 39.7           | /                                          | 20-O- |                |                                         |
| 9   | 49.9           | 1.37 m                                     | 1''   | 97.9           | 5.17 (d, <i>J</i> = 7.7 Hz)             |
| 10  | 36.7           | /                                          | 2''   | 75.1           | 3.97 m                                  |
| 11  | 30.1           | 1.40 m, 1.99 m <sup>a</sup>                | 3''   | 78.8           | 4.30 m                                  |
| 12  | 70.1           | 3.12 m                                     | 4''   | 71.9           | 4.22 m                                  |
| 13  | 49.2           | 2.05 m                                     | 5''   | 76.4           | 4.04 m                                  |
| 14  | 51.2           | /                                          | 6''   | 68.3           | 4.09 m, 4.36 m                          |
| 15  | 30.5           | 0.97 m, 1.45 m                             | -     |                |                                         |
| 16  | 26.4           | 1.38 m, 2.24 m                             | 1'''  | 109.8          | 4.69 br.s                               |
| 17  | 51.7           | 2.54 m                                     | 2'''  | 83.4           | 4.13 m <sup>a</sup>                     |
| 18  | 15.6           | 0.93 s                                     | 3'''  | 78.7           | 4.16 m <sup>a</sup>                     |
| 19  | 16.0           | 0.79 s                                     | 4'''  | 85.9           | 4.06 m <sup>a</sup>                     |
| 20  | 83.2           | /                                          | 5'''  | 62.7           | 3.71 (d, <i>J</i> = 10.2 Hz),<br>4.30 m |
| 21  | 22.3           | 1.63 s                                     |       |                |                                         |
| 22  | 32.6           | 2.54 m, 2.24 (dd, <i>J</i> = 9.8, 15.2 Hz) |       |                |                                         |
| 23  | 30.6           | 1.53 m, 2.23 m                             |       |                |                                         |
| 24  | 76.6           | 4.47 m <sup>a</sup>                        |       |                |                                         |
| 25  | 150.0          | /                                          |       |                |                                         |
| 26  | 110.3          | 4.95 br.s, 5.26 br.s                       |       |                |                                         |
| 27  | 17.8           | 1.971 s                                    |       |                |                                         |
| 28  | 27.9           | 1.31 s                                     |       |                |                                         |
| 29  | 16.6           | 0.96 s                                     |       |                |                                         |
| 30  | 17.0           | 0.94 s                                     |       |                |                                         |

a: Overlapped signals, s: singlet, d: doublet, m: multiplet, br.s: broad singlet, ': the first sugar, '': the second sugar, ''': the third sugar, /: no hydrogen.

**Table S3.**  $^1\text{H}$  and  $^{13}\text{C}$  NMR spectral data of **3** (in  $\text{C}_5\text{D}_5\text{N}$ ,  $J$  in Hz)

| No. | $\delta_{\text{C}}$ | $\delta_{\text{H}}$ ( $J$ in Hz)          | No.      | $\delta_{\text{C}}$ | $\delta_{\text{H}}$ ( $J$ in Hz)   |
|-----|---------------------|-------------------------------------------|----------|---------------------|------------------------------------|
| 1   | 38.9                | 0.76 m, 1.52 m                            | 3-O-Glc  |                     |                                    |
| 2   | 26.5                | 1.82 m, 2.28 m                            | 1'       | 106.8               | 4.97 (d, $J = 7.6$ Hz)             |
| 3   | 88.6                | 3.38 (dd, $J = 4.2, 11.6$ Hz)             | 2'       | 75.6                | 4.08 m                             |
| 4   | 39.4                | /                                         | 3'       | 78.7                | 4.19 m                             |
| 5   | 56.1                | 0.73 (d, $J = 12.4$ Hz)                   | 4'       | 71.6                | 4.24 m                             |
| 6   | 18.2                | 1.36 m, 1.47 m                            | 5'       | 78.2                | 4.04 m                             |
| 7   | 34.8                | 1.18 m                                    | 6'       | 62.8                | 4.64 (d, $J = 12.4$ Hz)            |
| 8   | 39.7                | /                                         | 20-O-Glc |                     |                                    |
| 9   | 50.0                | 1.37 m                                    | 1''      | 97.6                | 5.12 br.s                          |
| 10  | 37.3                | /                                         | 2''      | 74.8                | 3.93 m                             |
| 11  | 30.7                | 1.51 m <sup>a</sup> , 1.99 m <sup>a</sup> | 3''      | 78.5                | 4.25 m                             |
| 12  | 66.9                | 4.18 m <sup>a</sup>                       | 4''      | 71.3                | 4.20 m <sup>a</sup>                |
| 13  | 49.3                | 2.02 m                                    | 5''      | 76.6                | 4.14 m <sup>a</sup>                |
| 14  | 51.2                | /                                         | 6''      | 69.4                | 4.10 m, 4.31 m                     |
| 15  | 30.3                | 0.95 m <sup>a</sup> , 1.45 m <sup>a</sup> | -Xyl     |                     |                                    |
| 16  | 26.1                | 1.30 m <sup>a</sup> , 2.25 m <sup>a</sup> | 1'''     | 105.5               | 4.97 (d, $J = 7.2$ Hz)             |
| 17  | 51.6                | 1.42 m <sup>a</sup>                       | 2'''     | 74.7                | 4.02 m                             |
| 18  | 15.8                | 0.97 s                                    | 3'''     | 77.8                | 4.13 m                             |
| 19  | 16.1                | 0.81 s                                    | 4'''     | 70.9                | 4.14 m                             |
| 20  | 83.0                | /                                         | 5'''     | 66.8                | 3.96 (t, $J = 10.2$ Hz),<br>4.30 m |
| 21  | 23.6                | 1.63 s                                    |          |                     |                                    |
| 22  | 22.2                | 1.64 m <sup>a</sup>                       |          |                     |                                    |
| 23  | 26.0                | 1.97 m <sup>a</sup> , 2.23 m <sup>a</sup> |          |                     |                                    |
| 24  | 89.8                | 4.80 m                                    |          |                     |                                    |
| 25  | 145.9               | /                                         |          |                     |                                    |
| 26  | 110.3               | 5.09 br.s, 5.27 br.s                      |          |                     |                                    |
| 27  | 17.3                | 1.96 s                                    |          |                     |                                    |
| 28  | 27.9                | 1.32 s                                    |          |                     |                                    |
| 29  | 16.6                | 1.01 s                                    |          |                     |                                    |
| 30  | 17.0                | 0.98 s                                    |          |                     |                                    |

a: Overlapped signals, s: singlet, d: doublet, t: triplet, m: multiplet, br.s: broad singlet, ': the first sugar, '': the second sugar, ''': the third sugar, /: no hydrogen.

**Table S4.** <sup>1</sup>H and <sup>13</sup>C NMR spectral data of **4** (in C<sub>5</sub>D<sub>5</sub>N, *J* in Hz)

| No. | δ <sub>C</sub> | δ <sub>H</sub> ( <i>I</i> in Hz)          | No.      | δ <sub>C</sub> | δ <sub>H</sub> ( <i>I</i> in Hz) |
|-----|----------------|-------------------------------------------|----------|----------------|----------------------------------|
| 1   | 39.1           | 0.73 m, 1.52 m                            | 3-O-Glc  |                |                                  |
| 2   | 26.8           | 1.34 m, 1.98 m                            | 1'       | 104.7          | 4.93 (d, <i>I</i> = 7.8 Hz)      |
| 3   | 89.2           | 3.43 (dd, <i>I</i> = 4.8, 10.8 Hz)        | 2'       | 76.0           | 4.08 m <sup>a</sup>              |
| 4   | 39.7           | /                                         | 3'       | 78.9           | 4.21 m <sup>a</sup>              |
| 5   | 56.4           | 0.66 m                                    | 4'       | 71.8           | 3.99 m                           |
| 6   | 18.5           | 1.34 m, 1.47 m                            | 5'       | 78.2           | 4.05 m                           |
| 7   | 35.1           | 1.19 m <sup>a</sup>                       | 6'       | 62.8           | 4.44 m                           |
| 8   | 40.1           | /                                         | 20-O-Glc |                |                                  |
| 9   | 50.1           | 1.35 m                                    | 1''      | 97.9           | 5.14 (d, <i>I</i> = 7.8 Hz)      |
| 10  | 36.9           | /                                         | 2''      | 74.8           | 3.93 m                           |
| 11  | 30.8           | 1.54 m <sup>a</sup> , 1.99 m <sup>a</sup> | 3''      | 78.6           | 4.35 m                           |
| 12  | 70.6           | 3.65 m                                    | 4''      | 71.0           | 3.96 m <sup>a</sup>              |
| 13  | 49.5           | 4.94 m                                    | 5''      | 76.7           | 4.04 m                           |
| 14  | 51.5           | /                                         | 6''      | 69.1           | 4.15 m, 4.25 m                   |
| 15  | 30.5           | 0.97 m <sup>a</sup> , 1.45 m <sup>a</sup> | -Ara(p)  |                |                                  |
| 16  | 26.4           | 1.38 m <sup>a</sup> , 2.25 m <sup>a</sup> | 1'''     | 104.6          | 5.00 (d, <i>I</i> = 6.0 Hz)      |
| 17  | 52.4           | 3.16 m                                    | 2'''     | 72.1           | 4.46 m                           |
| 18  | 16.6           | 0.87 s                                    | 3'''     | 74.1           | 4.22 m                           |
| 19  | 16.3           | 0.95 s                                    | 4'''     | 68.5           | 4.37 m                           |
| 20  | 83.8           | /                                         | 5'''     | 65.6           | 3.79 m, 4.30 m                   |
| 21  | 23.3           | 1.48 s                                    |          |                |                                  |
| 22  | 39.6           | 2.24 (dd, <i>I</i> = 16.0, 9.6 Hz)        |          |                |                                  |
| 23  | 122.7          | 6.23 (ddd, <i>I</i> = 5.8, 8.5, 15.5 Hz)  |          |                |                                  |
| 24  | 142.2          | 6.09 (d, <i>I</i> = 15.5 Hz)              |          |                |                                  |
| 25  | 70.0           | /                                         |          |                |                                  |
| 26  | 17.7           | 1.59 s                                    |          |                |                                  |
| 27  | 17.8           | 1.53 s                                    |          |                |                                  |
| 28  | 27.9           | 1.30 s                                    |          |                |                                  |
| 29  | 28.1           | 0.99 s                                    |          |                |                                  |
| 30  | 17.2           | 1.02 s                                    |          |                |                                  |

a: Overlapped signals, s: singlet, d: doublet, m: multiplet, br.s: broad singlet, ': the first sugar, '': the second sugar, ''': the third sugar, /: no hydrogen.

**Table S5.** <sup>1</sup>H and <sup>13</sup>C NMR spectral data of **5** (in C<sub>5</sub>D<sub>5</sub>N, *J* in Hz)

| No. | δ <sub>C</sub> | δ <sub>H</sub> ( <i>I</i> in Hz)          | No.      | δ <sub>C</sub> | δ <sub>H</sub> ( <i>I</i> in Hz) |
|-----|----------------|-------------------------------------------|----------|----------------|----------------------------------|
| 1   | 39.0           | 0.74 m, 1.52 m                            | 3-O-Glc  |                |                                  |
| 2   | 26.6           | 1.34 m, 1.82 m                            | 1'       | 104.6          | 4.95 (d, <i>J</i> = 7.7 Hz)      |
| 3   | 88.6           | 3.30 (dd, <i>J</i> = 3.9, 11.5 Hz)        | 2'       | 82.3           | 4.13 m <sup>a</sup>              |
| 4   | 39.5           | /                                         | 3'       | 78.5           | 4.37 m <sup>a</sup>              |
| 5   | 56.1           | 0.68 d ( <i>J</i> = 11.9 Hz)              | 4'       | 71.4           | 4.11 m <sup>a</sup>              |
| 6   | 18.2           | 1.34 m, 1.47 m                            | 5'       | 78.1           | 3.99 m <sup>a</sup>              |
| 7   | 34.9           | 1.20 d ( <i>J</i> = 11.9 Hz)              | 6'       | 62.7           | 4.39 m <sup>a</sup>              |
| 8   | 39.8           | /                                         | -O-Glc   |                |                                  |
| 9   | 50.0           | 1.35 m <sup>a</sup>                       | 1''      | 103.0          | 5.54 (d, <i>J</i> = 6.8 Hz)      |
| 10  | 36.7           | /                                         | 2''      | 84.2           | 4.23 m <sup>a</sup>              |
| 11  | 30.7           | 1.51 m <sup>a</sup> , 1.89 m <sup>a</sup> | 3''      | 77.7           | 4.31 m <sup>a</sup>              |
| 12  | 69.9           | 4.18 m <sup>a</sup>                       | 4''      | 71.1           | 4.24 m <sup>a</sup>              |
| 13  | 49.3           | 2.00 m <sup>a</sup>                       | 5''      | 77.6           | 4.16 m <sup>a</sup>              |
| 14  | 51.1           | /                                         | 6''      | 62.5           | 4.39 m <sup>a</sup>              |
| 15  | 30.4           | 0.96 m <sup>a</sup> , 1.42 m <sup>a</sup> | -Xyl     |                |                                  |
| 16  | 26.4           | 1.34 m <sup>a</sup> , 2.30 m <sup>a</sup> | 1'''     | 106.2          | 5.44 (d, <i>J</i> = 6.8 Hz)      |
| 17  | 51.2           | 2.57 m <sup>a</sup>                       | 2'''     | 75.8           | 4.13 m <sup>a</sup>              |
| 18  | 15.8           | 0.96 s                                    | 3'''     | 78.5           | 4.37 m <sup>a</sup>              |
| 19  | 16.1           | 0.80 s                                    | 4'''     | 70.9           | 4.11 m <sup>a</sup>              |
| 20  | 83.2           | /                                         | 5'''     | 67.2           | 3.71 (t, <i>J</i> = 10.2 Hz)     |
| 21  | 22.1           | 1.64 s                                    | 20-O-Glc |                |                                  |
| 22  | 32.7           | 1.90 m, 2.58 m                            | 1''''    | 97.8           | 5.12 br.s                        |
| 23  | 26.4           | 1.97 m <sup>a</sup> , 2.20 m <sup>a</sup> | 2''''    | 74.7           | 3.88 m <sup>a</sup>              |
| 24  | 90.0           | 4.80 (t, <i>J</i> = 6.7 Hz)               | 3''''    | 78.1           | 4.17 m <sup>a</sup>              |
| 25  | 146.1          | /                                         | 4''''    | 71.5           | 4.24 m <sup>a</sup>              |
| 26  | 113.1          | 5.09 br.s, 5.28 br.s                      | 5''''    | 76.6           | 3.99 m <sup>a</sup>              |
| 27  | 17.3           | 1.96 s                                    | 6''''    | 69.9           | 4.30 m <sup>a</sup>              |
| 28  | 27.8           | 1.28 s                                    | -Xyl     |                | 4.76 (d, <i>J</i> = 10.0 Hz)     |
| 29  | 16.4           | 1.11 s                                    | 1'''''   | 105.5          | 5.01 (d, <i>J</i> = 7.4 Hz)      |
| 30  | 17.2           | 0.95 s                                    | 2'''''   | 74.6           | 4.06 m <sup>a</sup>              |
|     |                |                                           | 3'''''   | 78.4           | 4.37 m <sup>a</sup>              |
|     |                |                                           | 4'''''   | 70.5           | 4.17 m <sup>a</sup>              |
|     |                |                                           | 5'''''   | 66.8           | 3.76 (t, <i>J</i> = 10.2 Hz)     |
|     |                |                                           |          |                | 4.33 m <sup>a</sup>              |

a: Overlapped signals, s: singlet, d: doublet, t: triplet, m: multiplet, br.s: broad singlet, ': the first sugar, '': the second sugar, ''': the third sugar, ''': the fourth sugar, ''': the fifth sugar, /: no hydrogen.

**Table S6.** <sup>1</sup>H and <sup>13</sup>C NMR spectral data of **6** (in C<sub>5</sub>D<sub>5</sub>N, *J* in Hz)

| No. | δ <sub>C</sub> | δ <sub>H</sub> ( <i>I</i> in Hz)          | No.      | δ <sub>C</sub> | δ <sub>H</sub> ( <i>I</i> in Hz)          |
|-----|----------------|-------------------------------------------|----------|----------------|-------------------------------------------|
| 1   | 38.9           | 0.74 m, 1.52 m                            | 3-O-Glc  |                |                                           |
| 2   | 26.5           | 1.33 m, 1.81 m                            | 1'       | 104.6          | 4.96 (d, <i>J</i> = 6.2 Hz)               |
| 3   | 88.6           | 3.30 (dd-like)                            | 2'       | 82.7           | 4.15 m <sup>a</sup>                       |
| 4   | 39.5           | /                                         | 3'       | 77.7           | 4.39 m <sup>a</sup>                       |
| 5   | 56.1           | 0.69 (d, <i>J</i> = 11.7 Hz)              | 4'       | 71.4           | 4.14 m <sup>a</sup>                       |
| 6   | 18.2           | 1.38 m, 1.54 m <sup>a</sup>               | 5'       | 77.9           | 3.99 m <sup>a</sup>                       |
| 7   | 34.8           | 1.21 (d, <i>J</i> = 11.0 Hz)              | 6'       | 62.7           | 4.51 m <sup>a</sup>                       |
| 8   | 39.8           | /                                         | -O-Glc   |                |                                           |
| 9   | 49.9           | 1.38 (d, <i>J</i> = 11.7 Hz)              | 1''      | 102.9          | 5.54 (dd-like)                            |
| 10  | 36.7           | /                                         | 2''      | 84.3           | 4.24 m <sup>a</sup>                       |
| 11  | 30.7           | 1.54 m <sup>a</sup> , 1.90 m <sup>a</sup> | 3''      | 78.1           | 4.31 m <sup>a</sup>                       |
| 12  | 70.2           | 4.07 m <sup>a</sup>                       | 4''      | 70.9           | 4.24 m <sup>a</sup>                       |
| 13  | 49.4           | 2.02 m <sup>a</sup>                       | 5''      | 77.6           | 4.16 m <sup>a</sup>                       |
| 14  | 51.2           | /                                         | 6''      | 62.5           | 4.03 m, 4.39 m <sup>a</sup>               |
| 15  | 30.3           | 0.98 m <sup>a</sup> , 1.44 m <sup>a</sup> | -Xyl     |                |                                           |
| 16  | 26.1           | 1.46 m <sup>a</sup> , 2.30 m <sup>a</sup> | 1'''     | 106.2          | 5.45 (d, <i>J</i> = 6.0 Hz)               |
| 17  | 51.6           | 2.47 m <sup>a</sup>                       | 2'''     | 75.8           | 4.14 m <sup>a</sup>                       |
| 18  | 15.8           | 1.01 s                                    | 3'''     | 78.5           | 4.39 m <sup>a</sup>                       |
| 19  | 16.1           | 0.83 s                                    | 4'''     | 71.3           | 4.14 m <sup>a</sup>                       |
| 20  | 83.0           | /                                         | 5'''     | 67.2           | 3.72 m <sup>a</sup>                       |
| 21  | 23.0           | 1.63 s                                    | 20-O-Glc |                |                                           |
| 22  | 39.8           | 2.85 m, 3.13 m <sup>a</sup>               | 1''''    | 98.0           | 5.20 br.s                                 |
| 23  | 126.5          | 6.20 m <sup>a</sup>                       | 3''''    | 78.1           | 3.95 m <sup>a</sup>                       |
| 24  | 137.8          | 6.15 br.s                                 | 4''''    | 71.5           | 4.21 m <sup>a</sup>                       |
| 25  | 81.1           | /                                         | 5''''    | 76.6           | 3.99 m <sup>a</sup>                       |
| 26  | 24.8           | 1.62 s                                    | 6''''    | 69.7           | 4.35 m <sup>a</sup>                       |
| 27  | 25.2           | 1.62 s                                    | -Xyl     |                | 4.76 (d, <i>J</i> = 11.2                  |
| 28  | 27.8           | 1.29 s                                    | 1''''    | 105.4          | 5.00 (d, <i>J</i> = 6.8 Hz)               |
| 29  | 16.3           | 1.12 s                                    | 2''''    | 74.7           | 4.05 m <sup>a</sup>                       |
| 30  | 17.0           | 0.92 s                                    | 3''''    | 78.8           | 4.39 m <sup>a</sup>                       |
|     |                |                                           | 4''''    | 70.5           | 4.17 m <sup>a</sup>                       |
|     |                |                                           | 5''''    | 66.8           | 3.72 m <sup>a</sup> , 4.34 m <sup>a</sup> |

a: Overlapped signals, s: singlet, d: doublet, m: multiplet, br.s: broad singlet, ': the first sugar, '':

the second sugar, ''': the third sugar, ''': the fourth sugar, ''': the fifth sugar, /: no hydrogen.

**Table S7.** <sup>1</sup>H and <sup>13</sup>C NMR spectral data of **7** (in C<sub>5</sub>D<sub>5</sub>N, *J* in Hz)

| No. | δ <sub>C</sub> | δ <sub>H</sub> ( <i>I</i> in Hz)          | No.      | δ <sub>C</sub> | δ <sub>H</sub> ( <i>I</i> in Hz)          |
|-----|----------------|-------------------------------------------|----------|----------------|-------------------------------------------|
| 1   | 38.9           | 0.73 m, 1.52 m                            | 3-O-Glc  |                |                                           |
| 2   | 26.6           | 1.40 m, 1.95 m                            | 1'       | 104.6          | 4.95(d, <i>J</i> = 6.2 Hz)                |
| 3   | 88.6           | 3.30 (dd, <i>J</i> = 4.2, 11.4 Hz)        | 2'       | 82.7           | 4.13 m <sup>a</sup>                       |
| 4   | 39.5           | /                                         | 3'       | 77.6           | 4.20 m <sup>a</sup>                       |
| 5   | 56.1           | 0.68 (d, <i>J</i> = 11.3 Hz)              | 4'       | 71.43          | 4.14 m <sup>a</sup>                       |
| 6   | 18.2           | 1.37 m, 1.55 m <sup>a</sup>               | 5'       | 77.6           | 3.90 m <sup>a</sup>                       |
| 7   | 34.9           | 1.20 (d, <i>J</i> = 11.0 Hz)              | 6'       | 62.7           | 4.39 m <sup>a</sup> , 4.60 m <sup>a</sup> |
| 8   | 39.8           | /                                         | -O-Glc   |                |                                           |
| 9   | 49.9           | 1.38 (d, <i>J</i> = 11.7 Hz)              | 1''      | 102.9          | 5.52 (d, <i>J</i> = 7.8 Hz)               |
| 10  | 36.7           | /                                         | 2''      | 84.2           | 4.24 m <sup>a</sup>                       |
| 11  | 30.7           | 1.53 m <sup>a</sup> , 1.92 m <sup>a</sup> | 3''      | 78.1           | 3.95 m <sup>a</sup>                       |
| 12  | 70.5           | 4.13 m <sup>a</sup>                       | 4''      | 70.9           | 4.07 m <sup>a</sup>                       |
| 13  | 49.4           | 2.00 m <sup>a</sup>                       | 5''      | 77.6           | 4.26 m <sup>a</sup>                       |
| 14  | 51.2           | /                                         | 6''      | 62.5           | 4.00 m, 4.37 m <sup>a</sup>               |
| 15  | 30.6           | 0.97 m <sup>a</sup> , 1.42 m <sup>a</sup> | -Xyl     |                |                                           |
| 16  | 26.4           | 1.80 m <sup>a</sup> , 2.47 m <sup>a</sup> | 1'''     | 106.2          | 5.43 (d, <i>J</i> = 6.6 Hz)               |
| 17  | 51.6           | 2.57 m <sup>a</sup>                       | 2'''     | 75.8           | 4.12 m <sup>a</sup>                       |
| 18  | 15.8           | 0.79 s                                    | 3'''     | 78.5           | 4.39 m <sup>a</sup>                       |
| 19  | 16.1           | 0.93 s                                    | 4'''     | 71.3           | 4.12 m <sup>a</sup>                       |
| 20  | 83.3           | /                                         | 5'''     | 67.2           | 3.70 m <sup>a</sup>                       |
| 21  | 22.4           | 1.63 s                                    | 20-O-Glc |                |                                           |
| 22  | 39.6           | 1.85 m                                    | 1''''    | 98.0           | 5.20 s                                    |
| 23  | 126.2          | 5.20 m <sup>a</sup>                       | 2''''    | 74.8           | 3.95 m <sup>a</sup>                       |
| 24  | 137.8          | 6.15 br.s                                 | 3''''    | 78.5           | 4.33 m <sup>a</sup>                       |
| 25  | 81.1           | /                                         | 4''''    | 71.3           | 3.92 m <sup>a</sup>                       |
| 26  | 24.8           | 1.61 s                                    | 5''''    | 76.4           | 3.99 m <sup>a</sup>                       |
| 27  | 25.2           | 1.61 s                                    | 6''''    | 68.7           | 4.25 m <sup>a</sup>                       |
| 28  | 27.8           | 1.27 s                                    |          |                | 4.71 (d, <i>J</i> = 11.2 Hz)              |
|     |                |                                           | -Ara (p) |                |                                           |
| 29  | 16.3           | 1.14 s                                    | 1'''''   | 104.1          | 5.00 (d, <i>J</i> = 6.8 Hz)               |
| 30  | 16.8           | 0.94 s                                    | 2'''''   | 71.8           | 4.55 m <sup>a</sup>                       |
|     |                |                                           | 3'''''   | 73.9           | 4.23 m <sup>a</sup>                       |
|     |                |                                           | 4'''''   | 68.3           | 4.37 m <sup>a</sup>                       |
|     |                |                                           | 5'''''   | 65.1           | 3.79 m <sup>a</sup> , 4.31 m <sup>a</sup> |

a: Overlapped signals, s: singlet, d: doublet, m: multiplet, br.s: broad singlet, ': the first sugar, '': the second sugar, ''': the third sugar, ''': the fourth sugar, ''': the fifth sugar, /: no hydrogen.

**Table S8.** <sup>1</sup>H and <sup>13</sup>C NMR spectral data of **8** (in C<sub>5</sub>D<sub>5</sub>N, *J* in Hz)

| No. | δ <sub>C</sub> | δ <sub>H</sub> ( <i>J</i> in Hz)          | No.      | δ <sub>C</sub> | δ <sub>H</sub> ( <i>J</i> in Hz)          |
|-----|----------------|-------------------------------------------|----------|----------------|-------------------------------------------|
| 1   | 39.8           | 0.86 m, 1.56 m                            | 3-O-Glc  |                |                                           |
| 2   | 26.7           | 1.76 m, 2.19 m                            | 1'       | 105.3          | 4.96 (d, <i>J</i> = 8.3 Hz)               |
| 3   | 89.1           | 3.30 (dd, <i>J</i> = 4.2, 11.4 Hz)        | 2'       | 83.2           | 4.23 m <sup>a</sup>                       |
| 4   | 39.1           | /                                         | 3'       | 77.4           | 4.30 m <sup>a</sup>                       |
| 5   | 56.5           | 0.61 (d, <i>J</i> = 11.9 Hz)              | 4'       | 71.4           | 4.24 m <sup>a</sup>                       |
| 6   | 18.5           | 1.50, 1.40                                | 5'       | 78.1           | 3.94 m <sup>a</sup>                       |
| 7   | 35.2           | 1.47, 1.15                                | 6'       | 62.8           | 4.47 m <sup>a</sup> , 4.34 m <sup>a</sup> |
| 9   | 50.2           | 1.51 (d, <i>J</i> = 11.7 Hz)              | 1''      | 105.6          | 5.40 (d, <i>J</i> = 6.9 Hz)               |
| 10  | 37.0           | /                                         | 2''      | 75.2           | 4.08 m <sup>a</sup>                       |
| 11  | 30.9           | 1.80 m, 1.34 m                            | 3''      | 77.3           | 4.37 m <sup>a</sup>                       |
| 12  | 79.1           | 3.72 m <sup>a</sup>                       | 4''      | 71.7           | 4.13 m <sup>a</sup>                       |
| 13  | 49.5           | 1.38                                      | 5''      | 78.3           | 3.99 m <sup>a</sup>                       |
| 14  | 51.6           | /                                         | 6''      | 62.6           | 4.47 m, 4.22 m <sup>a</sup>               |
| 15  | 31.1           | 1.43 m <sup>a</sup> , 1.15 m <sup>a</sup> | -Xyl     |                |                                           |
| 16  | 26.9           | 2.24 m <sup>a</sup> , 2.16 m <sup>a</sup> | 1'''     | 106.2          | 5.44 (d, <i>J</i> = 6.6 Hz)               |
| 17  | 49.8           | 3.61 m <sup>a</sup>                       | 2'''     | 75.1           | 4.30 m <sup>a</sup>                       |
| 18  | 15.9           | 0.88 s                                    | 3'''     | 78.5           | 4.37 m <sup>a</sup>                       |
| 19  | 16.4           | 0.92 s                                    | 4'''     | 70.4           | 4.04 m <sup>a</sup>                       |
| 20  | 83.6           | /                                         | 5'''     | 65.8           | 3.75 m <sup>a</sup>                       |
| 21  | 22.8           | 1.61 s                                    | 20-O-Glc |                |                                           |
| 22  | 52.7           | 2.16 m, 2.24 m                            | 1''''    | 98.4           | 5.18 br.s                                 |
| 23  | 71.9           | 4.83 (t, <i>J</i> = 8.2 Hz)               | 3''''    | 78.5           | 3.95 m <sup>a</sup>                       |
| 24  | 129.4          | 6.02 (d, <i>J</i> = 7.6 Hz)               | 4''''    | 78.3           | 4.33 m <sup>a</sup>                       |
| 25  | 131.6          | /                                         | 5''''    | 71.7           | 4.70 m <sup>a</sup>                       |
| 26  | 29.7           | 1.65 s                                    | 6''''    | 67.2           | 4.36 m <sup>a</sup> , 4.29 m <sup>a</sup> |
|     |                |                                           | -Ara(f)  |                |                                           |
| 27  | 19.5           | 1.94 s                                    | 1'''''   | 110.3          | 5.68 (d, <i>J</i> = 6.8 Hz)               |
| 28  | 28.2           | 1.27 s                                    | 2'''''   | 83.5           | 4.27 m <sup>a</sup>                       |
| 29  | 16.7           | 1.10 s                                    | 3'''''   | 78.8           | 4.41 m <sup>a</sup>                       |
| 30  | 17.4           | 0.79 s                                    | 4'''''   | 85.9           | 4.23 m <sup>a</sup>                       |
|     |                |                                           | 5'''''   | 62.9           | 4.40 m <sup>a</sup> , 4.30 m <sup>a</sup> |

a: Overlapped signals, s: singlet, d: doublet, t: triplet, m: multiplet, br.s: broad singlet, ': the first sugar, '': the second sugar, ''': the third sugar, ''': the fourth sugar, ''': the fifth sugar, /: no hydrogen.



CD, UV, IR, HRESI, and NMR of 1-8

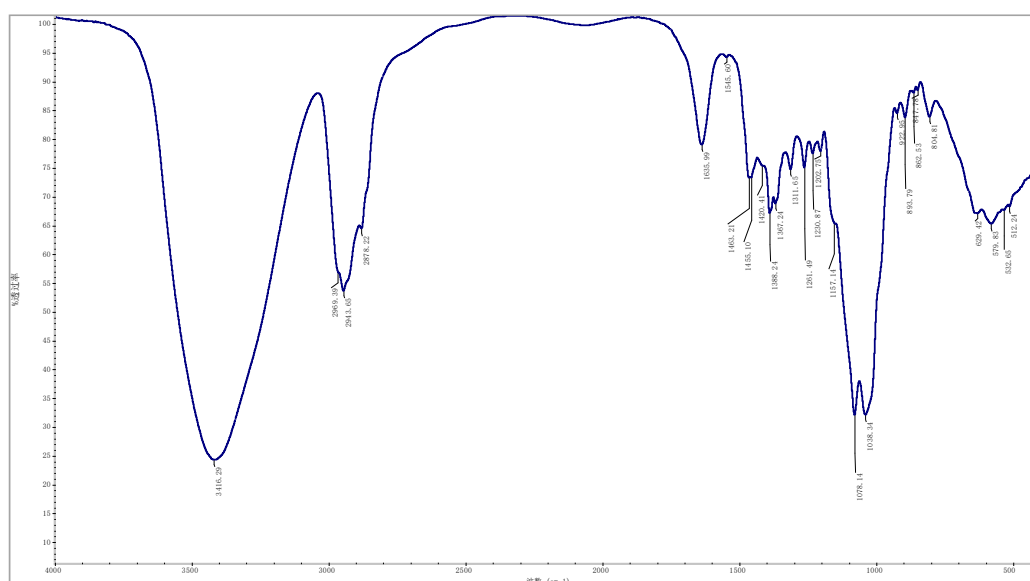

Figure S9. IR spectrum of 1

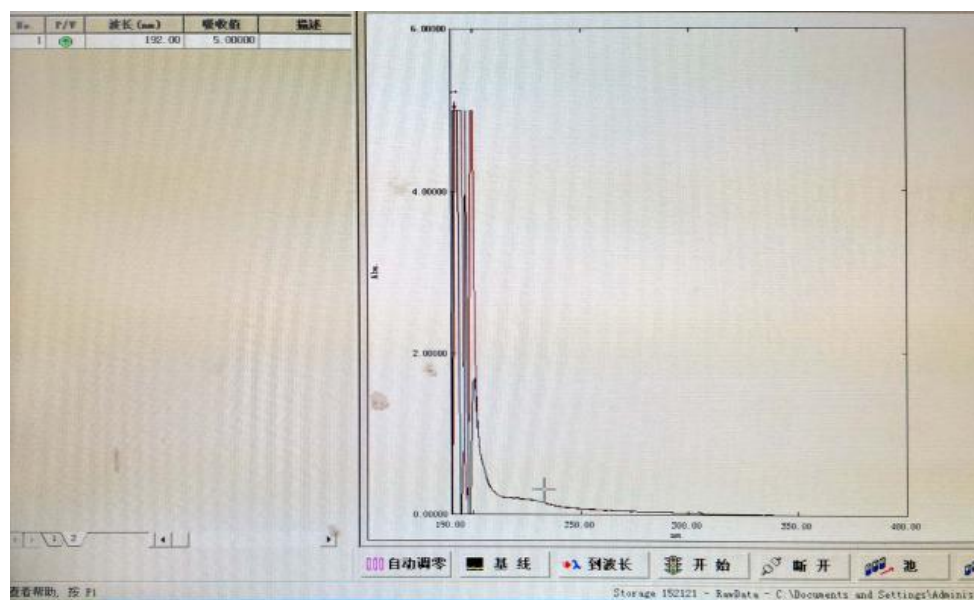

Figure S10. UV spectrum of 1

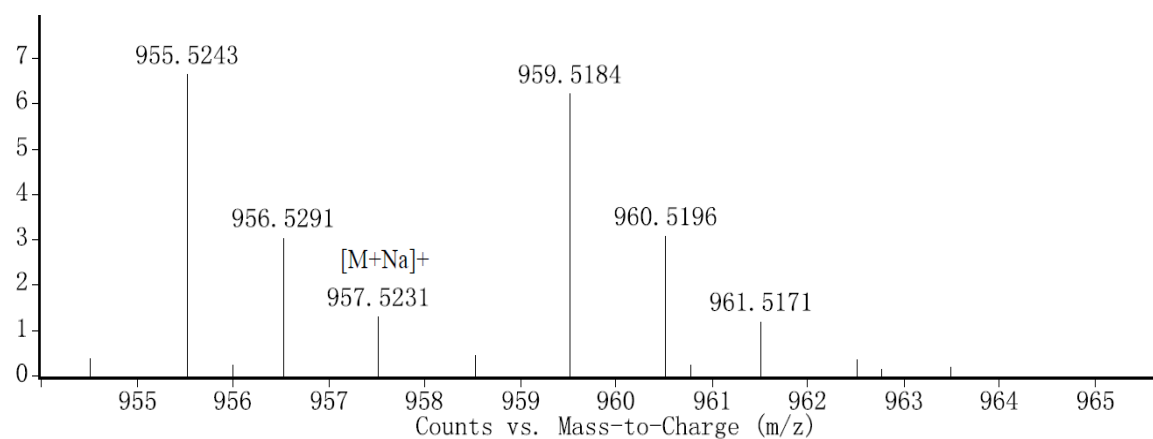

**Figure S11.** HRESI spectrum of **1**

**Rudolph Research Analytical**

This sample was measured on an Autopol VI, Serial #91058  
Manufactured by Rudolph Research Analytical, Hackettstown, NJ, USA.

Measurement Date : Thursday, 27-FEB-2020

Set Temperature : OFF

Time Delay : Disabled

Delay between Measurement : Disabled

| <u>n</u>    | <u>Average</u>   | <u>Std.Dev.</u> | <u>% RSD</u>  | <u>Maximum</u> | <u>Minimum</u> |               |              |                     |              |  |
|-------------|------------------|-----------------|---------------|----------------|----------------|---------------|--------------|---------------------|--------------|--|
| 5           | 7.00             | 0.45            | 6.42          | 7.50           | 6.67           |               |              |                     |              |  |
| <u>S.No</u> | <u>Sample ID</u> | <u>Time</u>     | <u>Result</u> | <u>Scale</u>   | <u>OR °Arc</u> | <u>WLG.nm</u> | <u>Lg.mm</u> | <u>Conc.g/100ml</u> | <u>Temp.</u> |  |
| 1           | GY-20            | 02:47:49 PM     | 7.50          | SR             | 0.009          | 589           | 100.00       | 0.120               | 23.4         |  |
| 2           | GY-20            | 02:47:55 PM     | 7.50          | SR             | 0.009          | 589           | 100.00       | 0.120               | 23.4         |  |
| 3           | GY-20            | 02:48:01 PM     | 6.67          | SR             | 0.008          | 589           | 100.00       | 0.120               | 23.3         |  |
| 4           | GY-20            | 02:48:07 PM     | 6.67          | SR             | 0.008          | 589           | 100.00       | 0.120               | 23.3         |  |
| 5           | GY-20            | 02:48:12 PM     | 6.67          | SR             | 0.008          | 589           | 100.00       | 0.120               | 23.3         |  |

**Figure S12.**  $[\alpha]_D^{23}$  of **1**

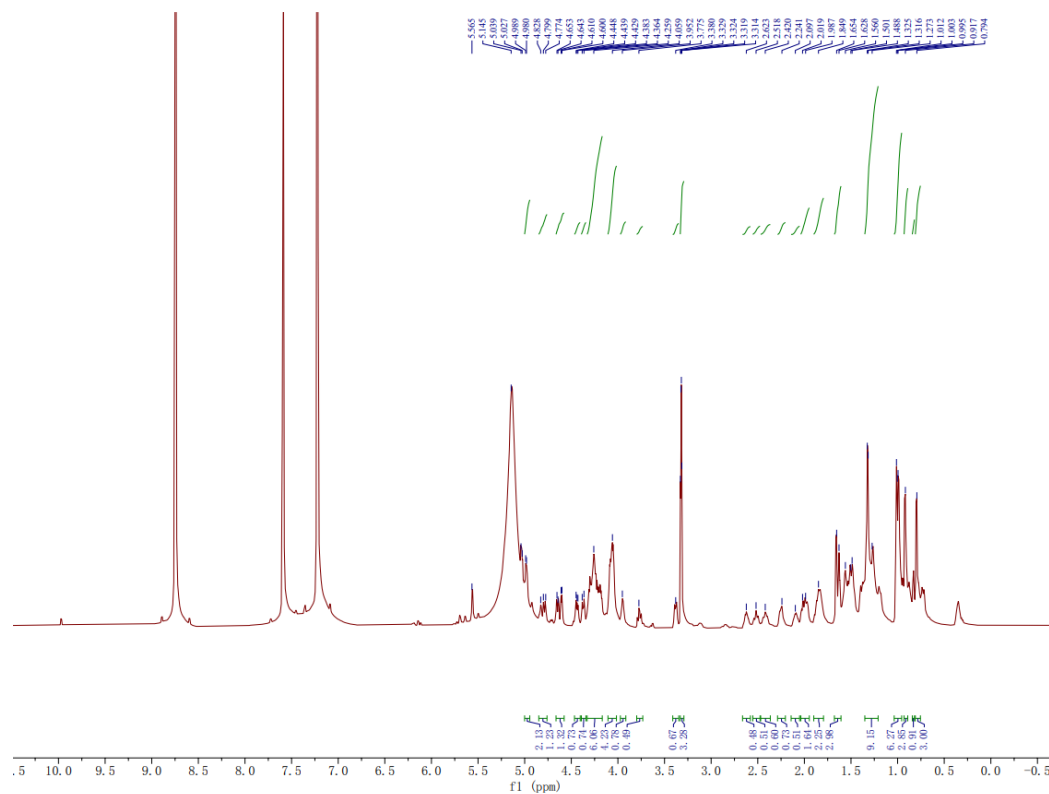

**Figure S13.**  $^1\text{H}$ -NMR spectrum of **1** in  $\text{C}_5\text{D}_5\text{N}$  at 298K (600 MHz)

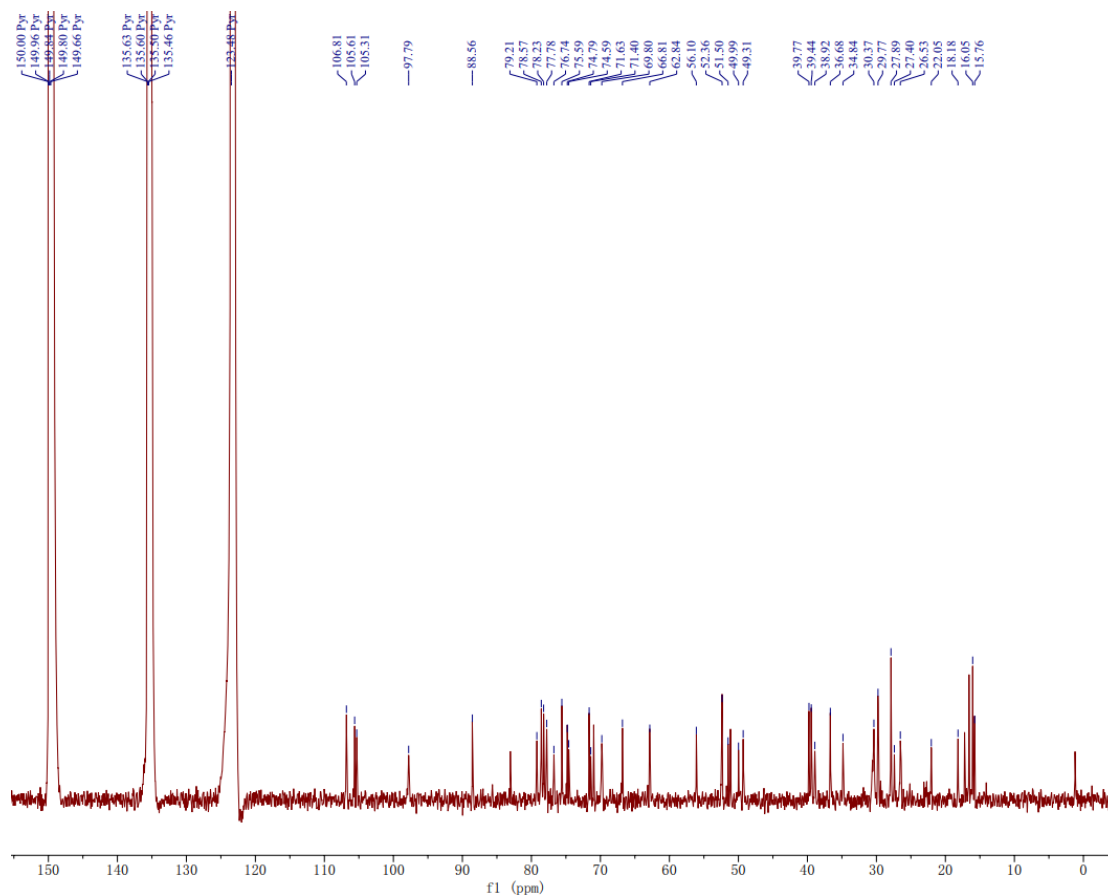

**Figure S14.**  $^{13}\text{C}$ -NMR spectrum of **1** in  $\text{C}_5\text{D}_5\text{N}$  at 298K (150 MHz)

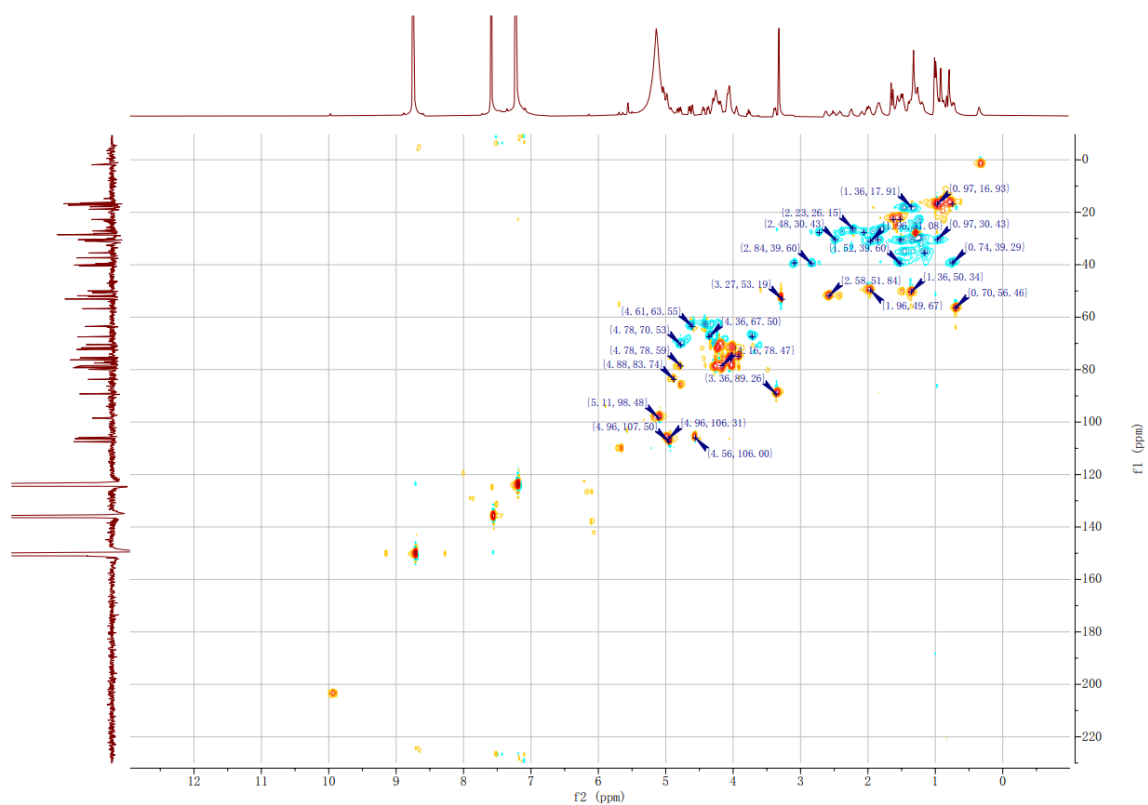

**Figure S15.** HSQC spectrum of **1** in  $C_5D_5N$  at 298K

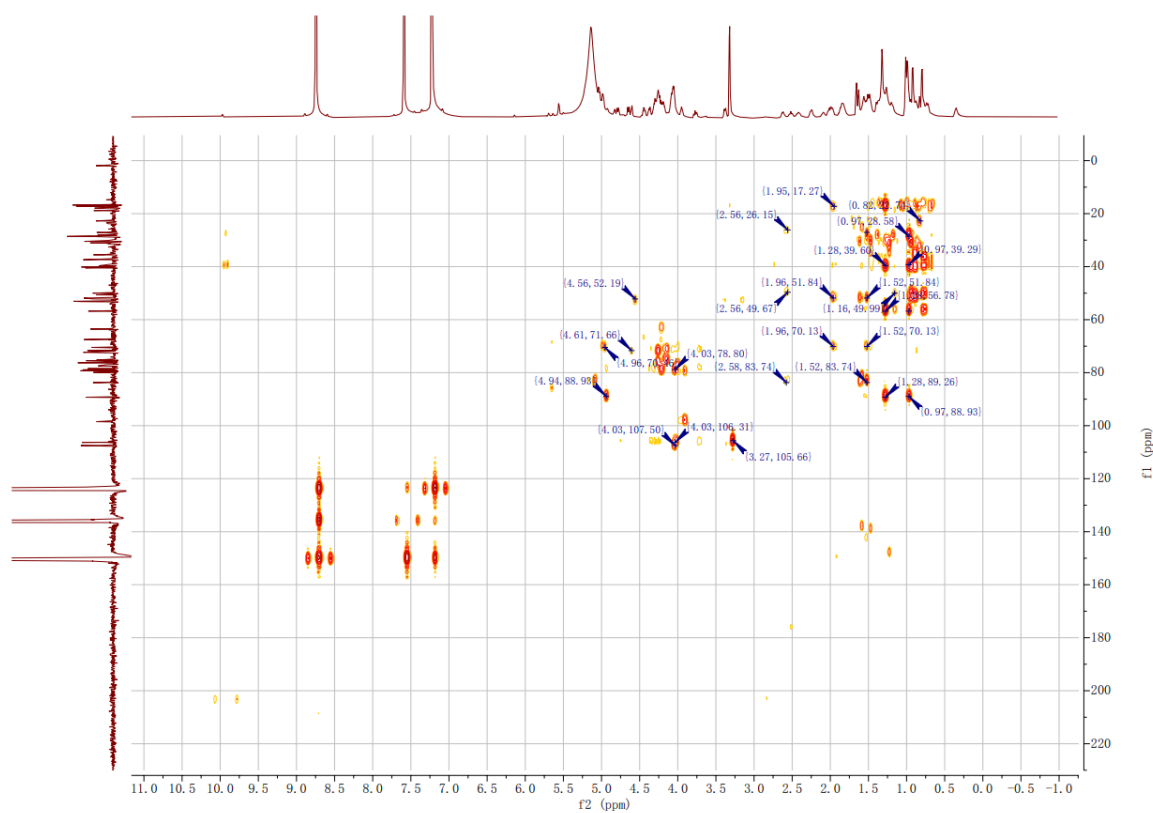

**Figure S16.** HMBC spectrum of **1** in  $C_5D_5N$  at 298K

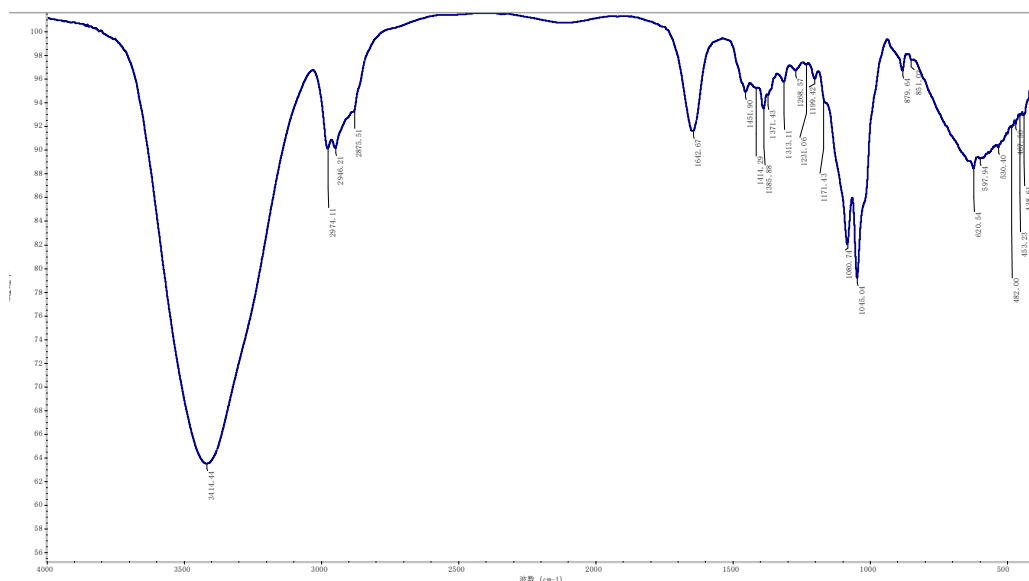

Figure S17. IR spectrum of 2

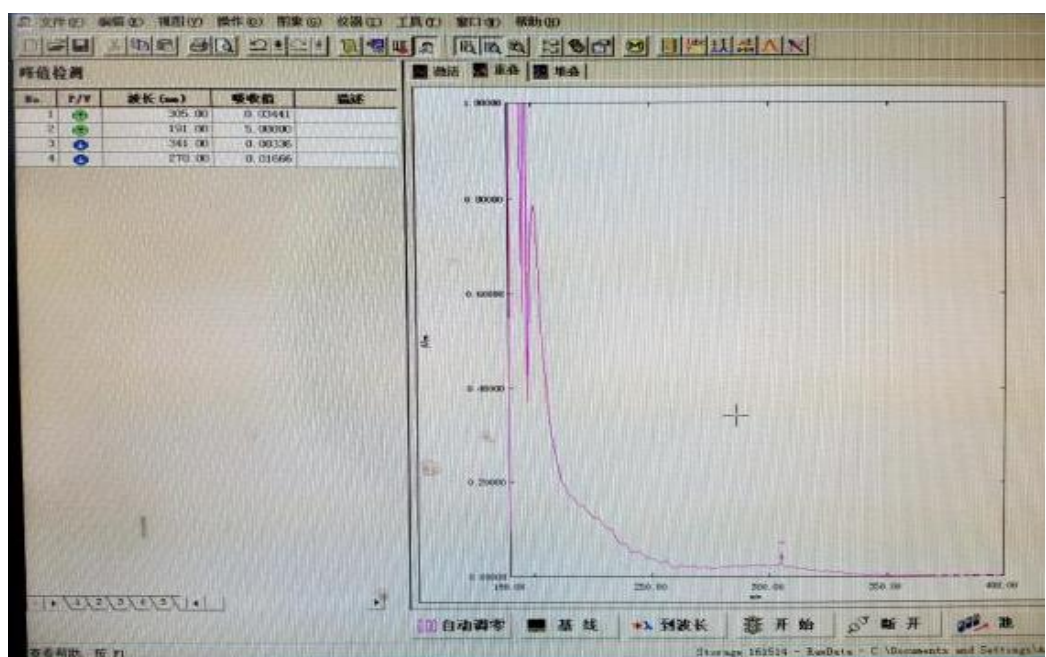

Figure S18. UV spectrum of 2

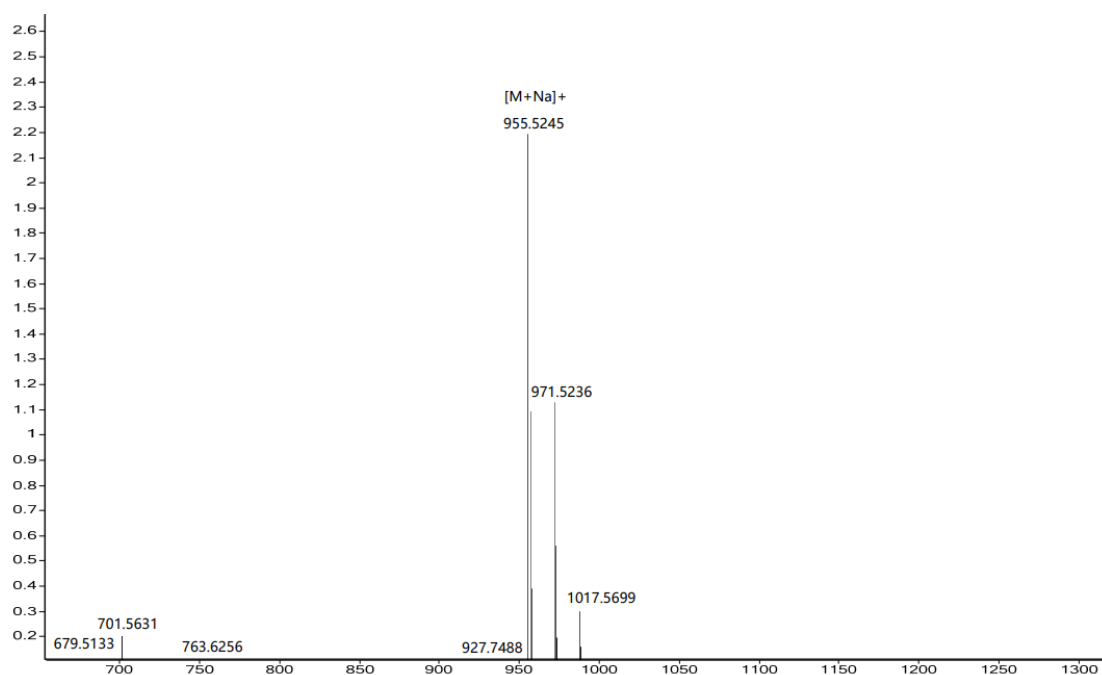

Figure S19. HRESIMS of 2

#### **Rudolph Research Analytical**

This sample was measured on an Autopol VI, Serial #91058  
Manufactured by Rudolph Research Analytical, Hackettstown, NJ, USA.

Measurement Date : Thursday, 27-FEB-2020

Set Temperature : OFF

Time Delay : Disabled

Delay between Measurement : Disabled

| <u>n</u>    | <u>Average</u>   | <u>Std.Dev.</u> | <u>% RSD</u>  | <u>Maximum</u> | <u>Minimum</u> |               |              |                     |              |  |
|-------------|------------------|-----------------|---------------|----------------|----------------|---------------|--------------|---------------------|--------------|--|
| 5           | -1.46            | 0.81            | -55.47        | -0.91          | -2.73          |               |              |                     |              |  |
| <u>S.No</u> | <u>Sample ID</u> | <u>Time</u>     | <u>Result</u> | <u>Scale</u>   | <u>OR °Arc</u> | <u>WLG.nm</u> | <u>Lg.mm</u> | <u>Conc.g/100ml</u> | <u>Temp.</u> |  |
| 1           | GY-23            | 02:51:41 PM     | -1.82         | SR             | -0.002         | 589           | 100.00       | 0.110               | 23.2         |  |
| 2           | GY-23            | 02:51:46 PM     | -0.91         | SR             | -0.001         | 589           | 100.00       | 0.110               | 23.2         |  |
| 3           | GY-23            | 02:51:52 PM     | -0.91         | SR             | -0.001         | 589           | 100.00       | 0.110               | 23.2         |  |
| 4           | GY-23            | 02:51:58 PM     | -0.91         | SR             | -0.001         | 589           | 100.00       | 0.110               | 23.2         |  |
| 5           | GY-23            | 02:52:03 PM     | -2.73         | SR             | -0.003         | 589           | 100.00       | 0.110               | 23.2         |  |

Figure S20.  $[\alpha]_D^{23}$  of 2

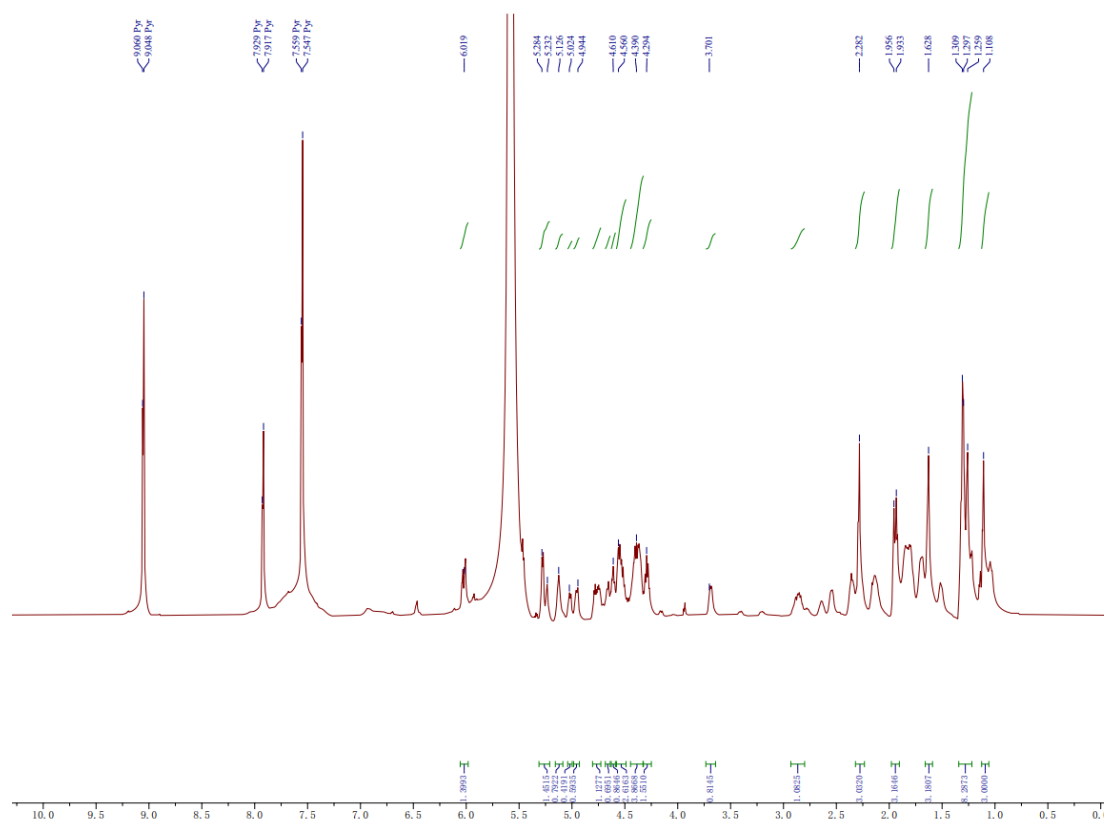

Figure S21.  $^1\text{H}$ -NMR spectrum of **2** in  $\text{C}_5\text{D}_5\text{N}$  at 298K (600 MHz)

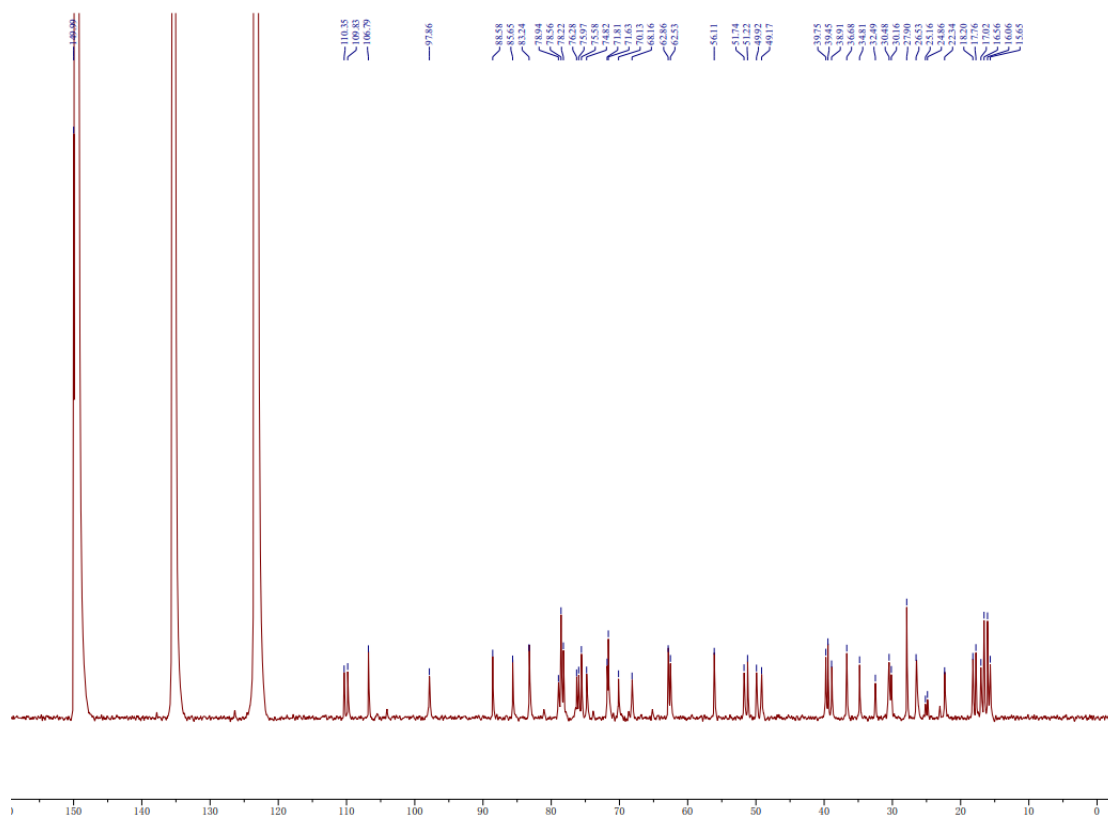

Figure S22.  $^{13}\text{C}$ -NMR spectrum of **2** in  $\text{C}_5\text{D}_5\text{N}$  at 298K (150 MHz)

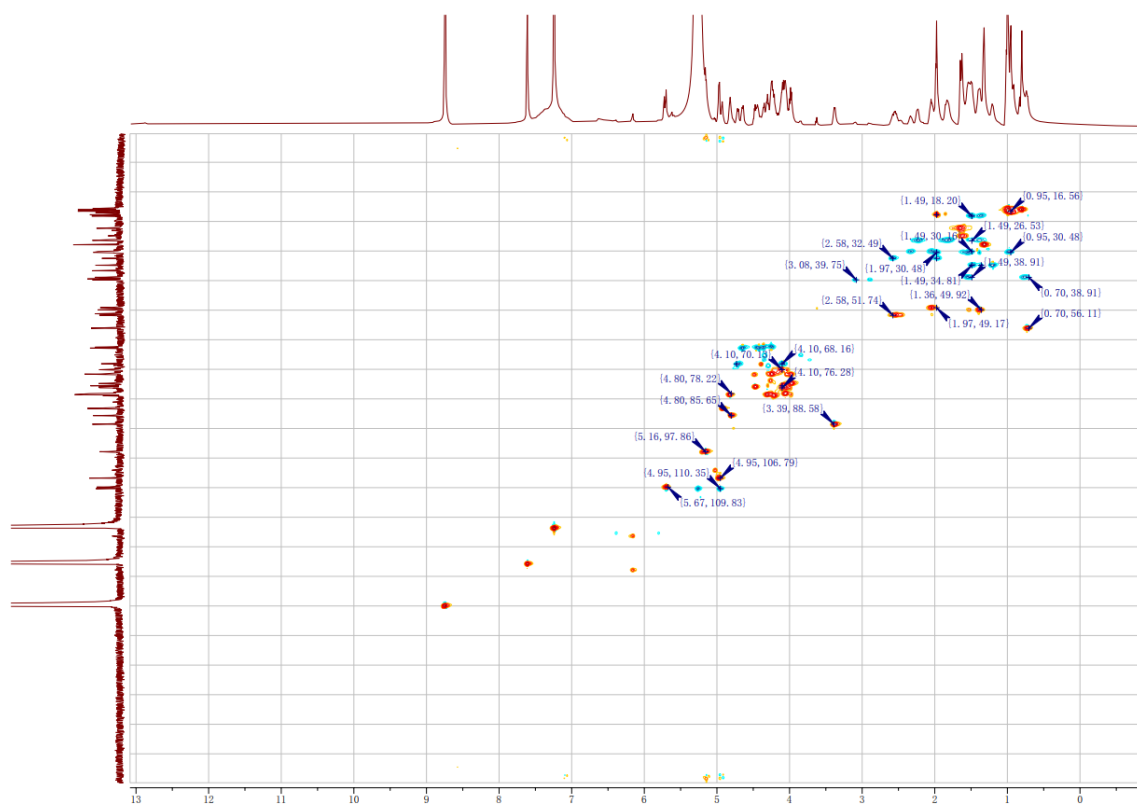

Figure S23. HSQC spectrum of 2 in C<sub>5</sub>D<sub>5</sub>N at 298K

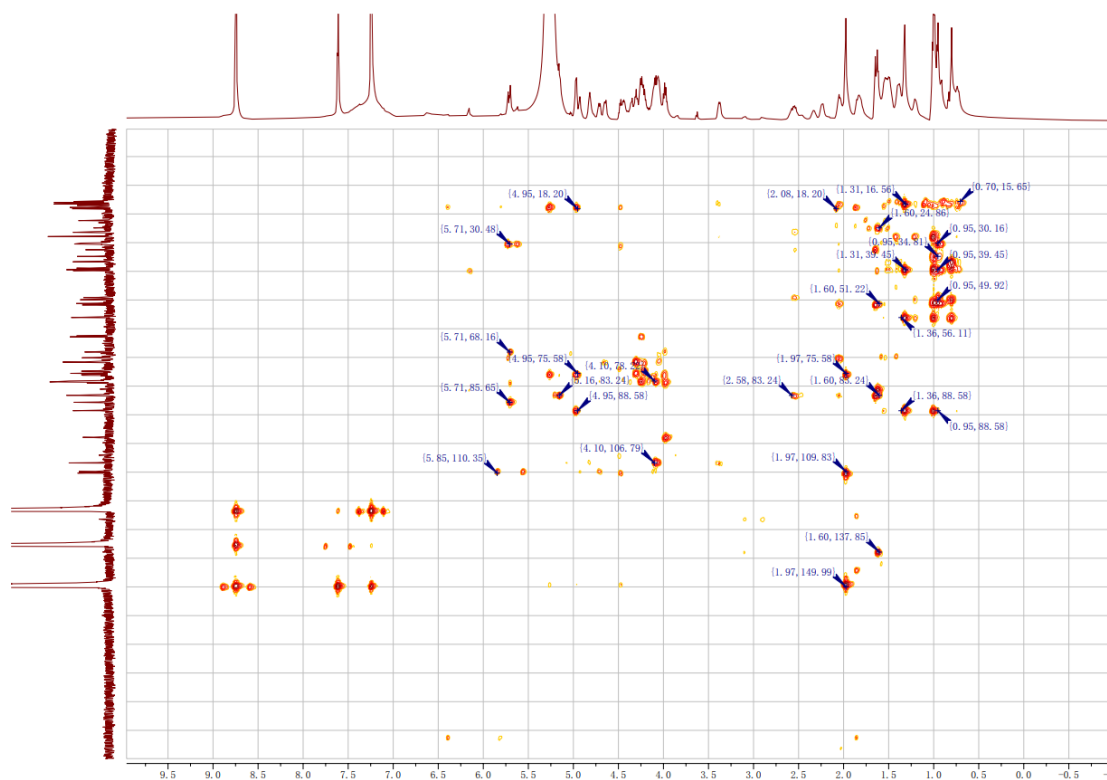

Figure S24. HMBC spectrum of 2 in C<sub>5</sub>D<sub>5</sub>N at 298K



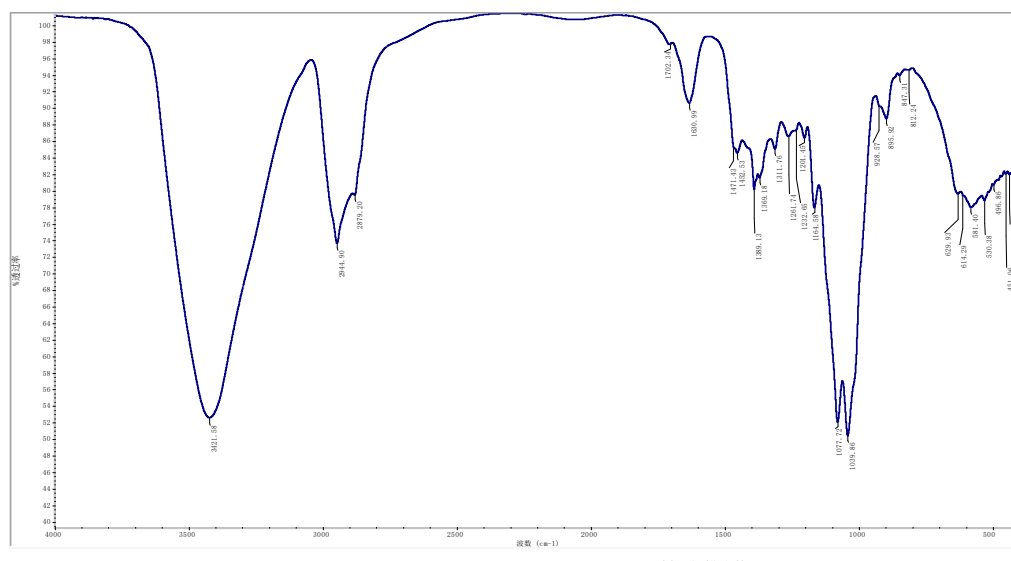

Figure S25. IR spectrum of 3

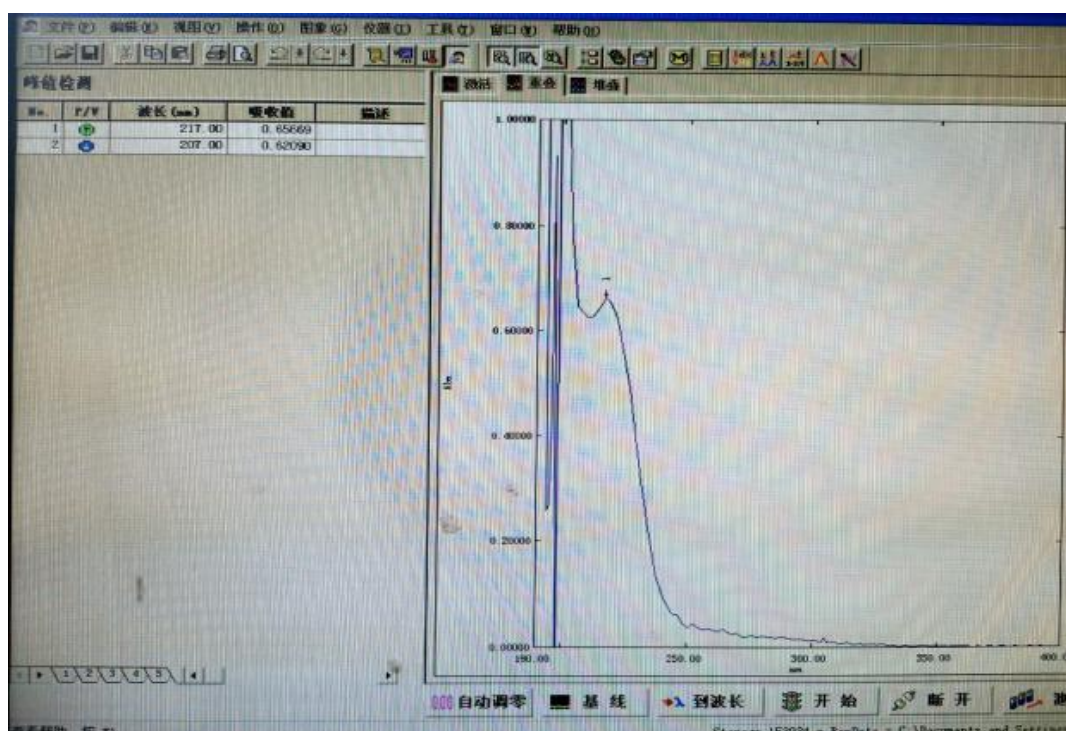

Figure S26. UV spectrum of 3

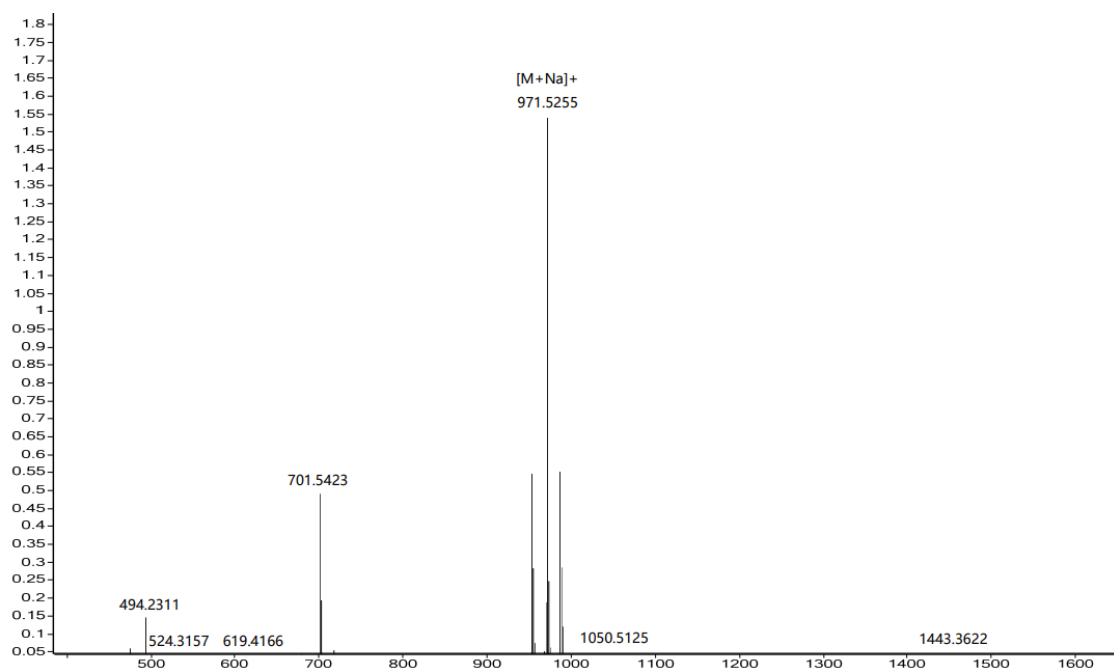

Figure S27. HRESI spectrum of 3

#### **Rudolph Research Analytical**

This sample was measured on an Autopol VI, Serial #91058  
Manufactured by Rudolph Research Analytical, Hackettstown, NJ, USA.

Measurement Date : Thursday, 27-FEB-2020

Set Temperature : OFF

Time Delay : Disabled

Delay between Measurement : Disabled

| <u>n</u>    | <u>Average</u>   | <u>Std.Dev.</u> | <u>% RSD</u>  | <u>Maximum</u> | <u>Minimum</u> |               |              |                     |              |  |
|-------------|------------------|-----------------|---------------|----------------|----------------|---------------|--------------|---------------------|--------------|--|
| 5           | 7.89             | 0.25            | 3.16          | 8.33           | 7.78           |               |              |                     |              |  |
| <u>S.No</u> | <u>Sample ID</u> | <u>Time</u>     | <u>Result</u> | <u>Scale</u>   | <u>OR °Arc</u> | <u>WLG.nm</u> | <u>Lg.mm</u> | <u>Conc.g/100ml</u> | <u>Temp.</u> |  |
| 1           | GY-19            | 02:43:12 PM     | 7.78          | SR             | 0.014          | 589           | 100.00       | 0.180               | 23.4         |  |
| 2           | GY-19            | 02:43:17 PM     | 7.78          | SR             | 0.014          | 589           | 100.00       | 0.180               | 23.4         |  |
| 3           | GY-19            | 02:43:23 PM     | 7.78          | SR             | 0.014          | 589           | 100.00       | 0.180               | 23.4         |  |
| 4           | GY-19            | 02:43:29 PM     | 8.33          | SR             | 0.015          | 589           | 100.00       | 0.180               | 23.4         |  |
| 5           | GY-19            | 02:43:34 PM     | 7.78          | SR             | 0.014          | 589           | 100.00       | 0.180               | 23.4         |  |

Figure S28.  $[\alpha]_D^{23}$  of 3

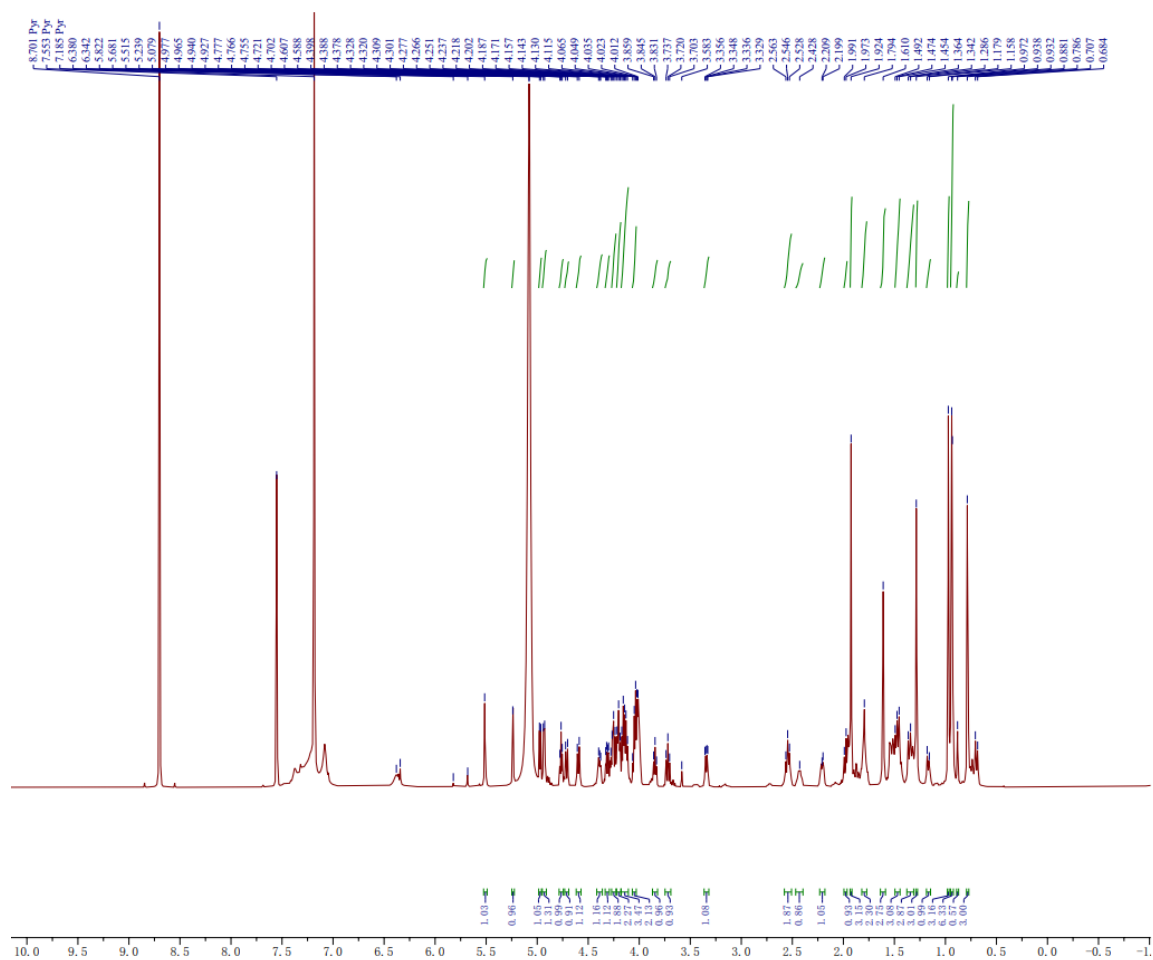

**Figure S29.**  $^1\text{H}$ -NMR spectrum of **3** in  $\text{C}_5\text{D}_5\text{N}$  at 298K (600 MHz)

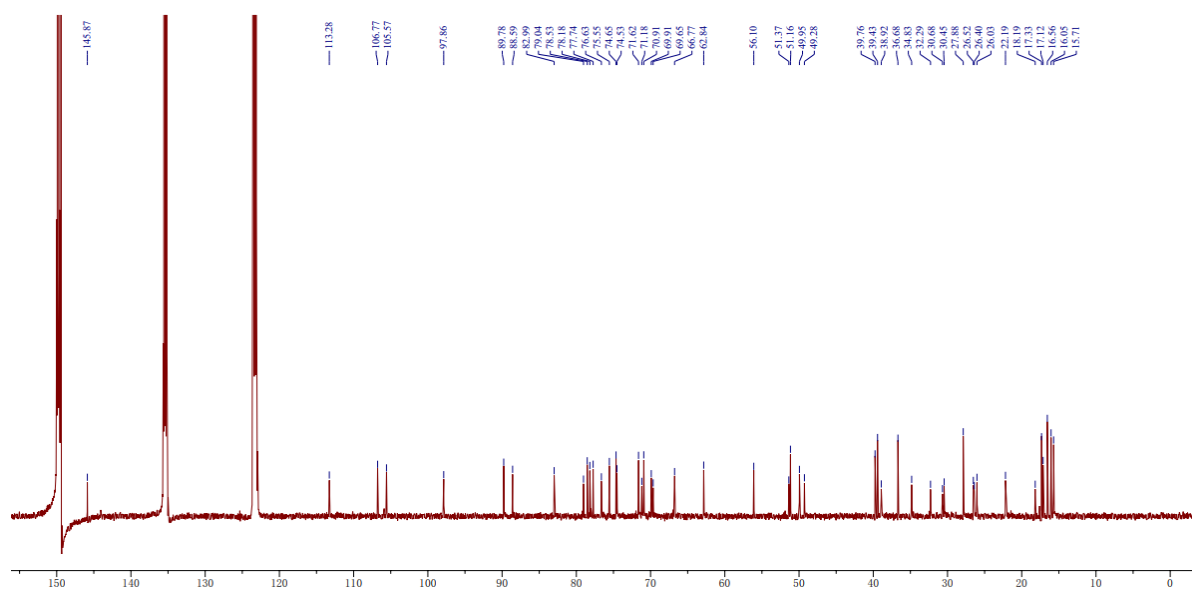

**Figure S30.**  $^{13}\text{C}$ -NMR spectrum of **3** in  $\text{C}_5\text{D}_5\text{N}$  at 298K (150 MHz)

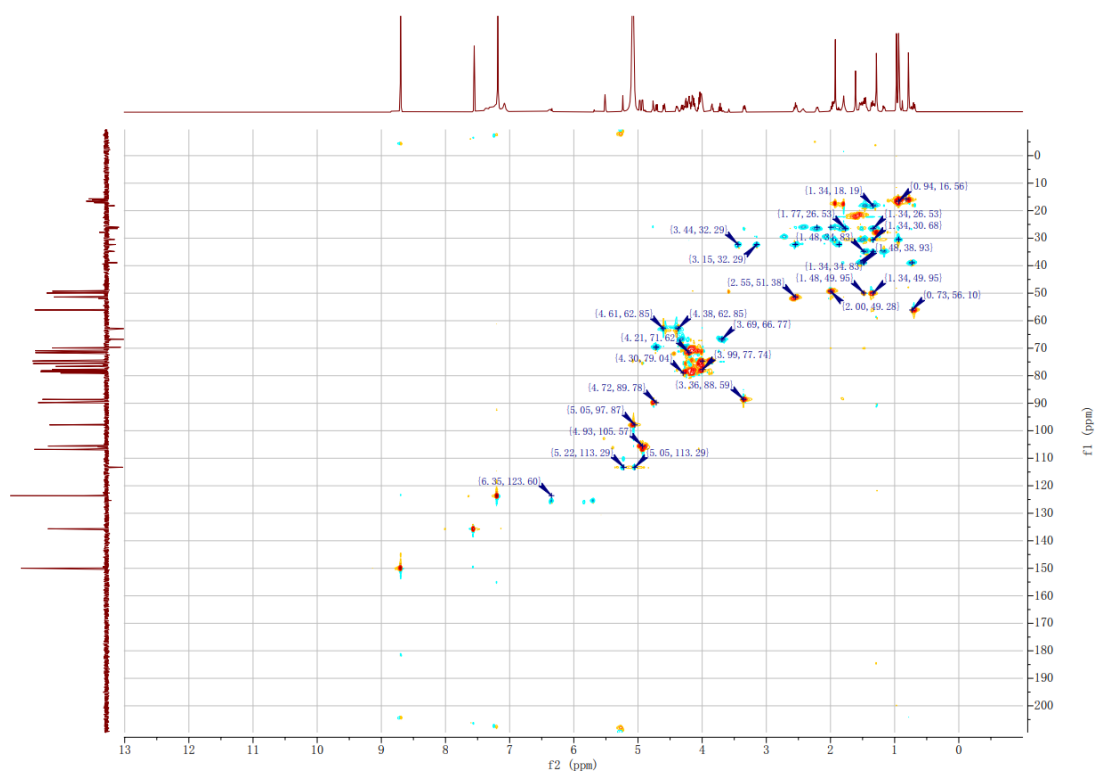

Figure S31. HSQC spectrum of 3 in  $C_5D_5N$  at 298K

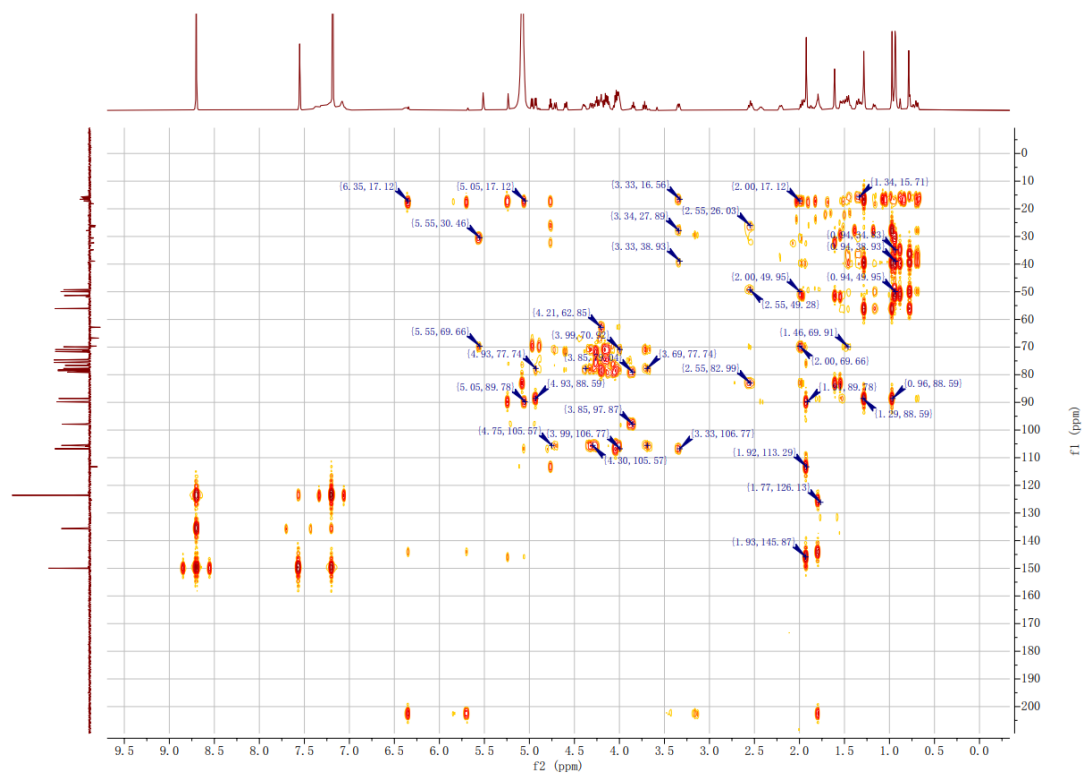

Figure S32. HMBC spectrum of 3 in  $C_5D_5N$  at 298K

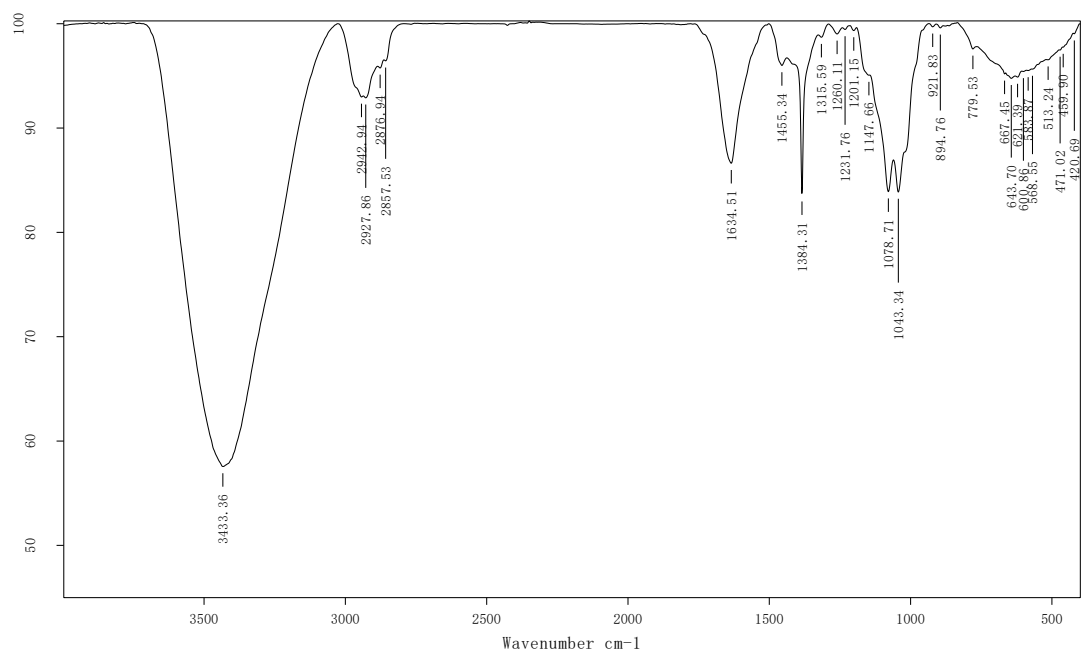

**Figure S33.** IR spectrum of **4**

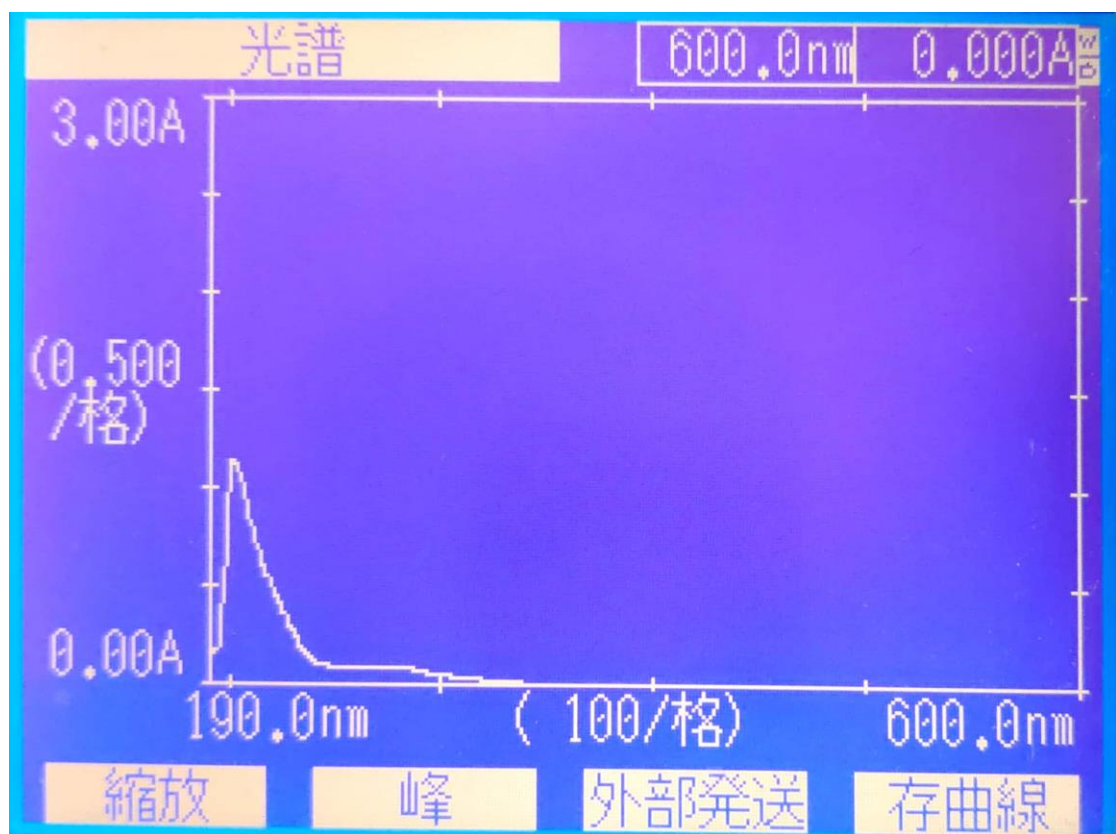

**Figure S34.** UV spectrum of **4**

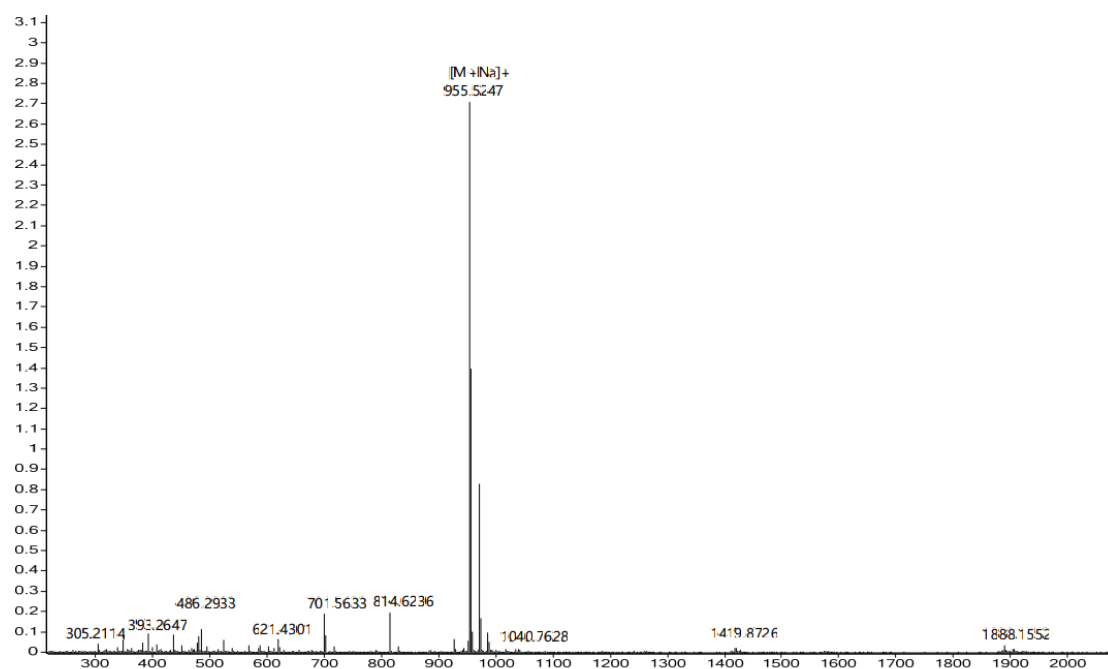

Figure S35. HRESI of 4

#### Rudolph Research Analytical

This sample was measured on an Autopol VI, Serial #91058  
Manufactured by Rudolph Research Analytical, Hackettstown, NJ, USA.

Measurement Date : Thursday, 14-OCT-2021

Set Temperature : OFF

Time Delay : Disabled

Delay between Measurement : Disabled

| <u>n</u>    | <u>Average</u>   | <u>Std.Dev.</u> | <u>% RSD</u>  | <u>Maximum</u> | <u>Minimum</u> |               |              |                     |              |  |
|-------------|------------------|-----------------|---------------|----------------|----------------|---------------|--------------|---------------------|--------------|--|
| 5           | 19.20            | 1.10            | 5.72          | 20.00          | 18.00          |               |              |                     |              |  |
| <u>S.No</u> | <u>Sample ID</u> | <u>Time</u>     | <u>Result</u> | <u>Scale</u>   | <u>OR °Arc</u> | <u>WLG.nm</u> | <u>Lg.mm</u> | <u>Conc.g/100ml</u> | <u>Temp.</u> |  |
| 1           | wxy-8-7          | 05:15:51 PM     | 20.00         | SR             | 0.010          | 589           | 100.00       | 0.050               | 22.9         |  |
| 2           | wxy-8-7          | 05:15:57 PM     | 20.00         | SR             | 0.010          | 589           | 100.00       | 0.050               | 22.9         |  |
| 3           | wxy-8-7          | 05:16:04 PM     | 20.00         | SR             | 0.010          | 589           | 100.00       | 0.050               | 22.9         |  |
| 4           | wxy-8-7          | 05:16:14 PM     | 18.00         | SR             | 0.009          | 589           | 100.00       | 0.050               | 22.9         |  |
| 5           | wxy-8-7          | 05:16:20 PM     | 18.00         | SR             | 0.009          | 589           | 100.00       | 0.050               | 22.9         |  |

Figure S36.  $[\alpha]_D^{23}$  of 4

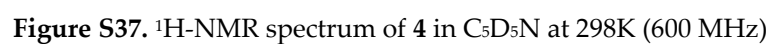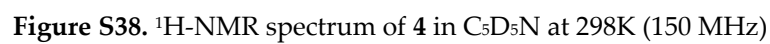

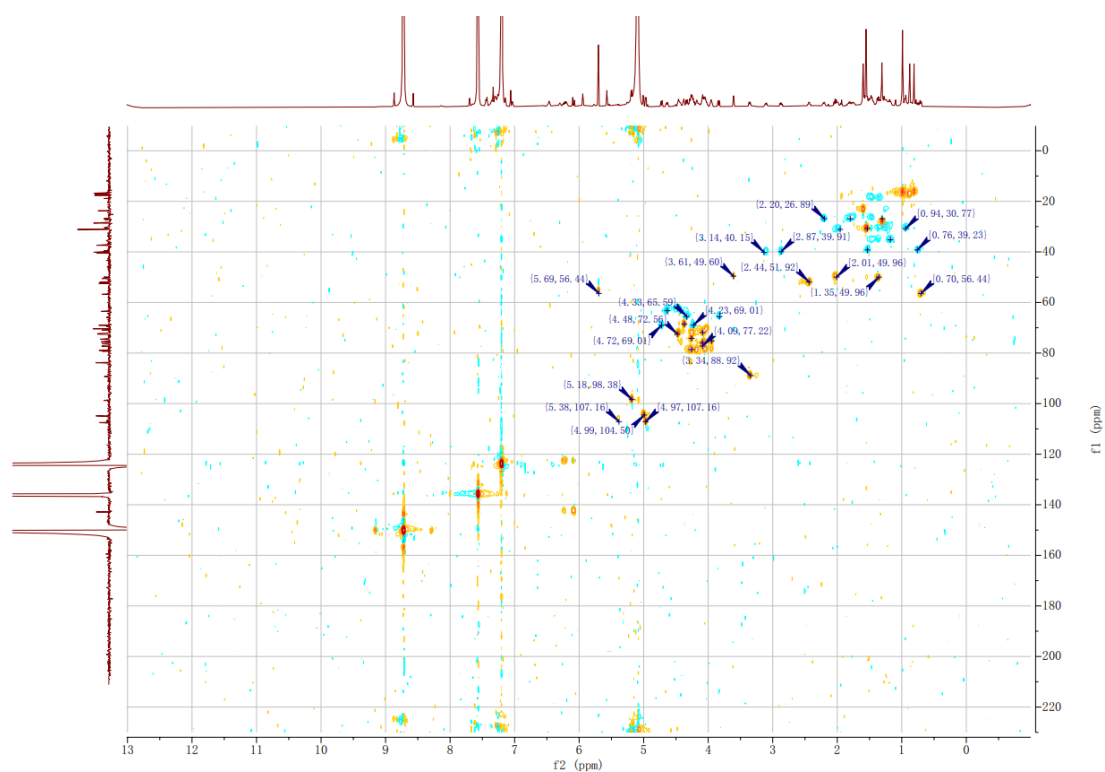

Figure S39.  $^1\text{H}$ -NMR spectrum of **4** in  $\text{C}_5\text{D}_5\text{N}$  at 298K

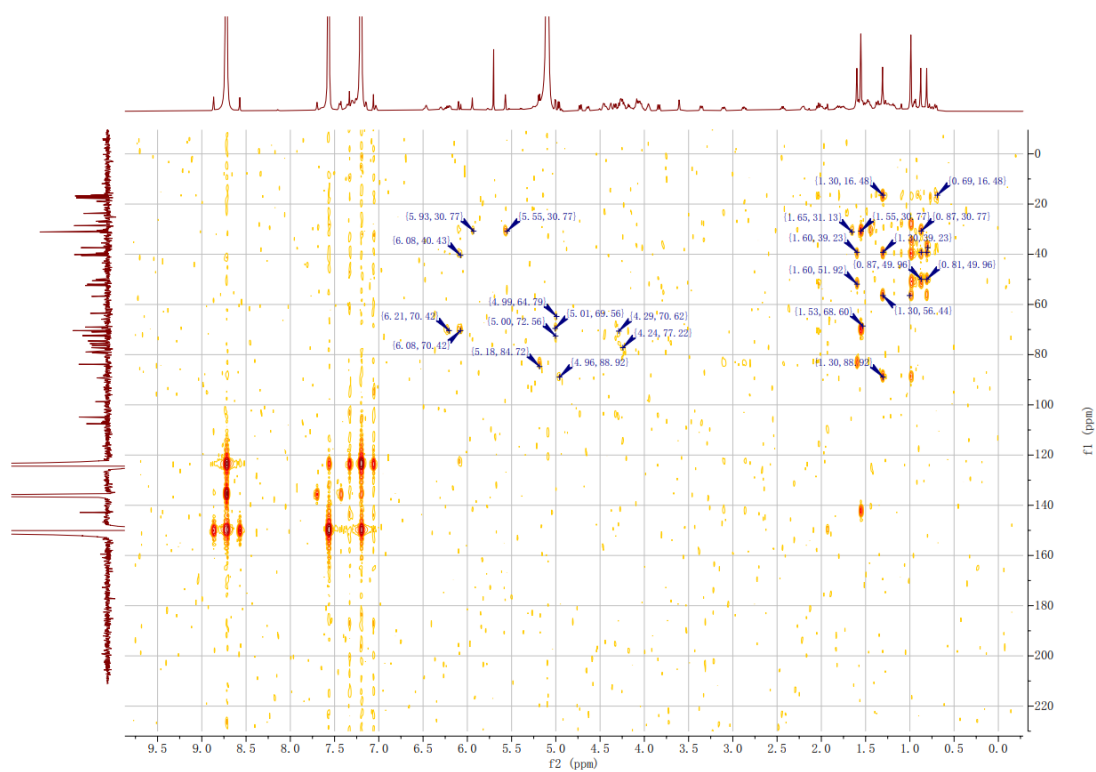

Figure S40.  $^1\text{H}$ -NMR spectrum of **4** in  $\text{C}_5\text{D}_5\text{N}$  at 298K



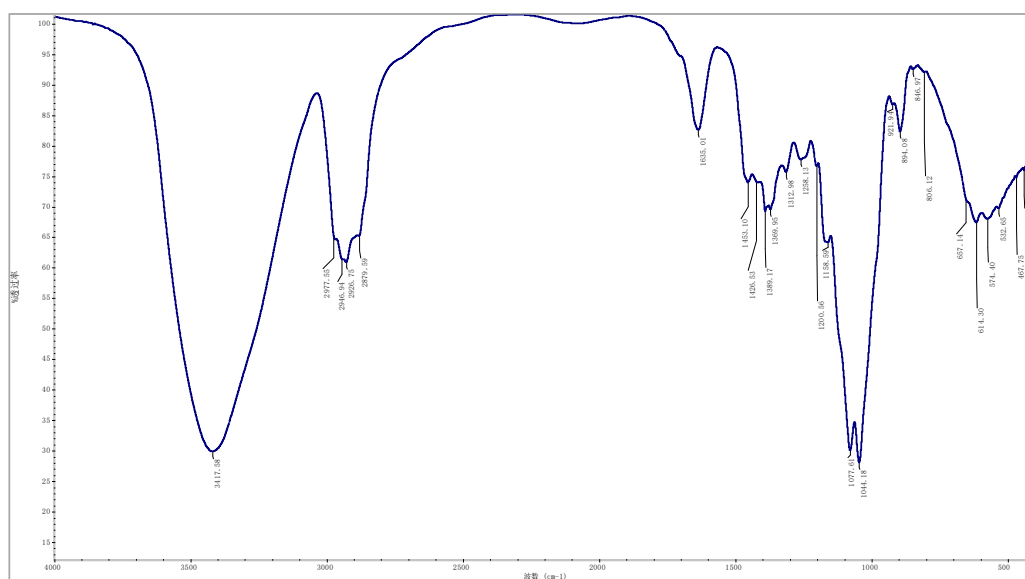

Figure S41. IR spectrum of 5

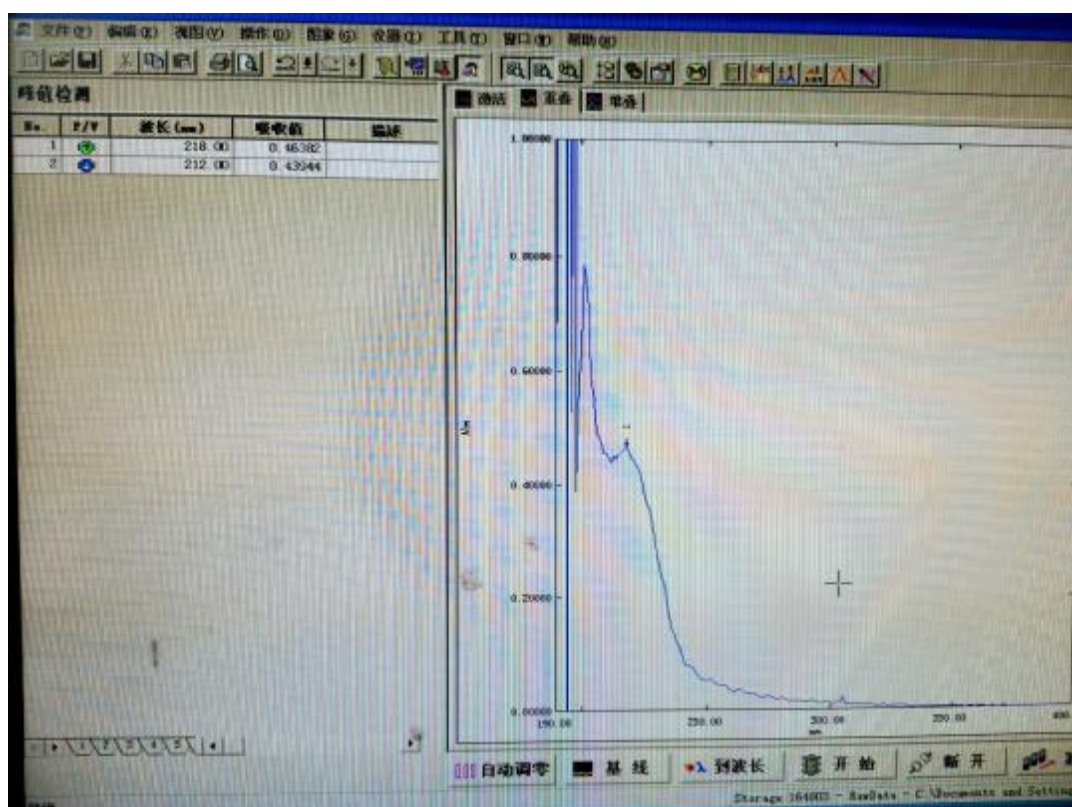

Figure S42. UV spectrum of 5

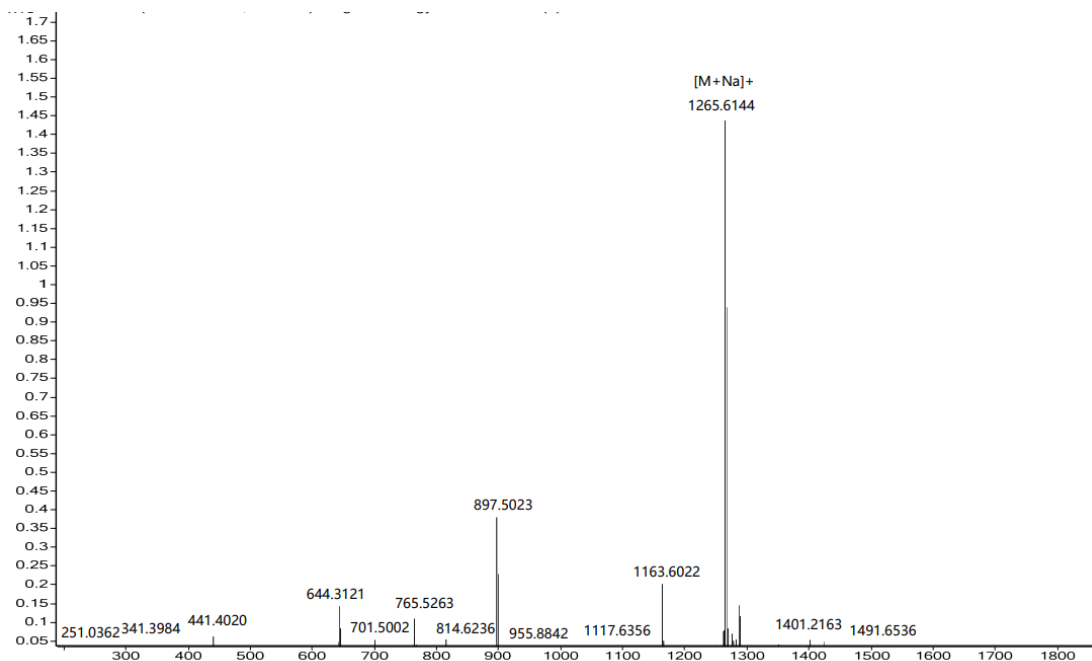

Figure S43. HRESI of 5

#### **Rudolph Research Analytical**

This sample was measured on an Autopol VI, Serial #91058  
Manufactured by Rudolph Research Analytical, Hackettstown, NJ, USA.

Measurement Date : Thursday, 27-FEB-2020

Set Temperature : OFF

Time Delay : Disabled

Delay between Measurement : Disabled

| <u>n</u>    | <u>Average</u>   | <u>Std.Dev.</u> | <u>% RSD</u>  | <u>Maximum</u> | <u>Minimum</u> |               |              |                     |              |  |
|-------------|------------------|-----------------|---------------|----------------|----------------|---------------|--------------|---------------------|--------------|--|
| 5           | 10.67            | 0.25            | 2.34          | 11.11          | 10.56          |               |              |                     |              |  |
| <u>S.No</u> | <u>Sample ID</u> | <u>Time</u>     | <u>Result</u> | <u>Scale</u>   | <u>OR °Arc</u> | <u>WLG.nm</u> | <u>Lg.mm</u> | <u>Conc.g/100ml</u> | <u>Temp.</u> |  |
| 1           | GY-42            | 03:19:10 PM     | 10.56         | SR             | 0.019          | 589           | 100.00       | 0.180               | 22.9         |  |
| 2           | GY-42            | 03:19:16 PM     | 10.56         | SR             | 0.019          | 589           | 100.00       | 0.180               | 22.9         |  |
| 3           | GY-42            | 03:19:22 PM     | 10.56         | SR             | 0.019          | 589           | 100.00       | 0.180               | 22.9         |  |
| 4           | GY-42            | 03:19:28 PM     | 11.11         | SR             | 0.020          | 589           | 100.00       | 0.180               | 22.9         |  |
| 5           | GY-42            | 03:19:33 PM     | 10.56         | SR             | 0.019          | 589           | 100.00       | 0.180               | 22.9         |  |

Figure S44.  $[\alpha]_D^{23}$  of 5



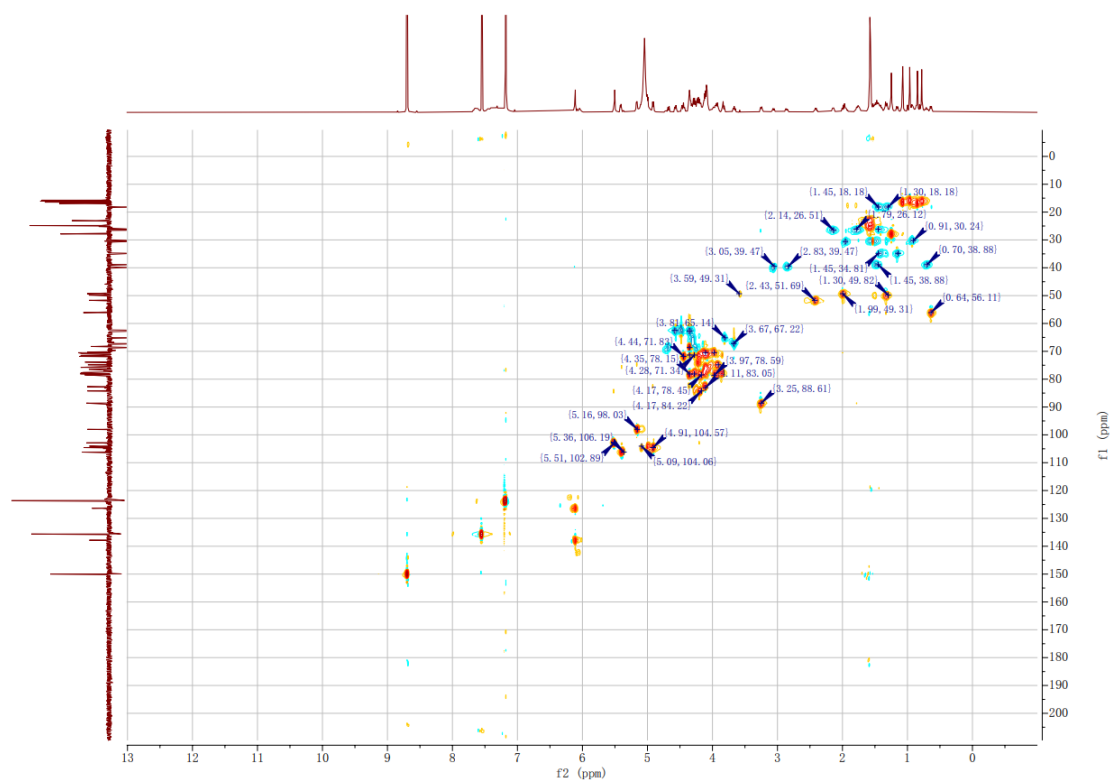

Figure S47. HSQC spectrum of 5 in C<sub>5</sub>D<sub>5</sub>N at 298K

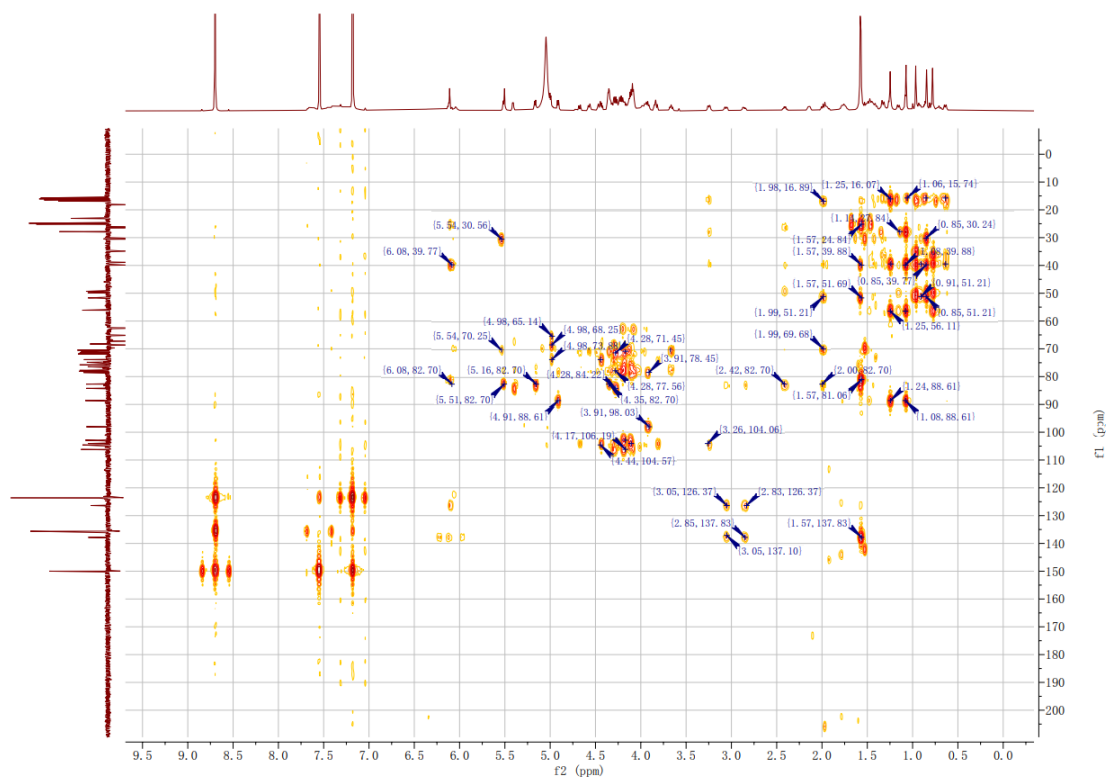

Figure S48. HMBC spectrum of 5 in C<sub>5</sub>D<sub>5</sub>N at 298K

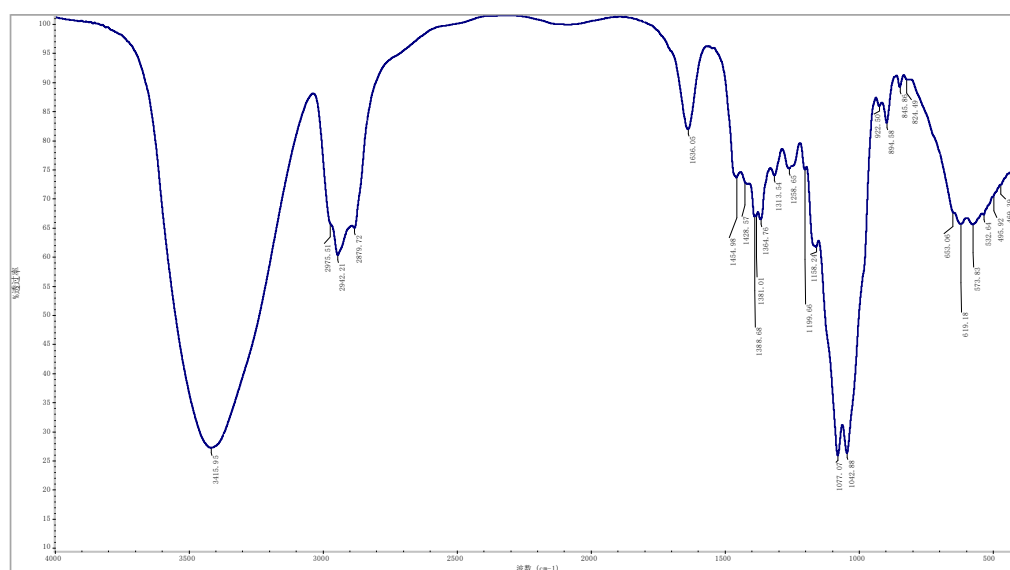

Figure S49. IR spectrum of 6

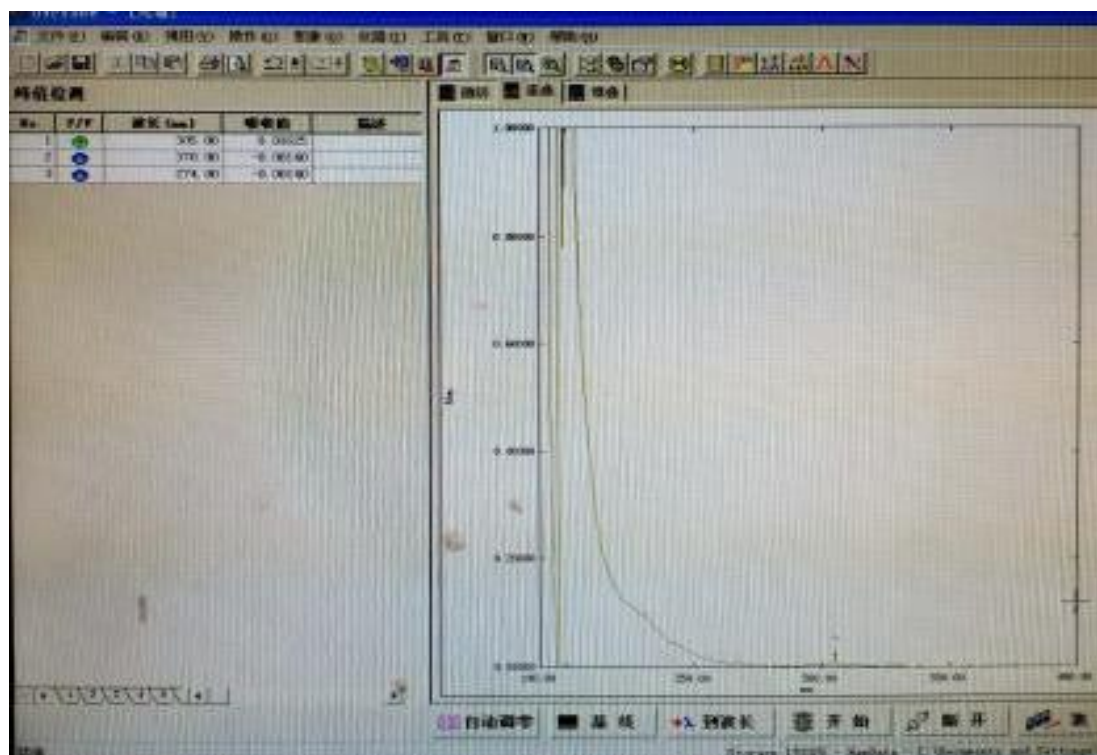

Figure S50. UV spectrum of 6

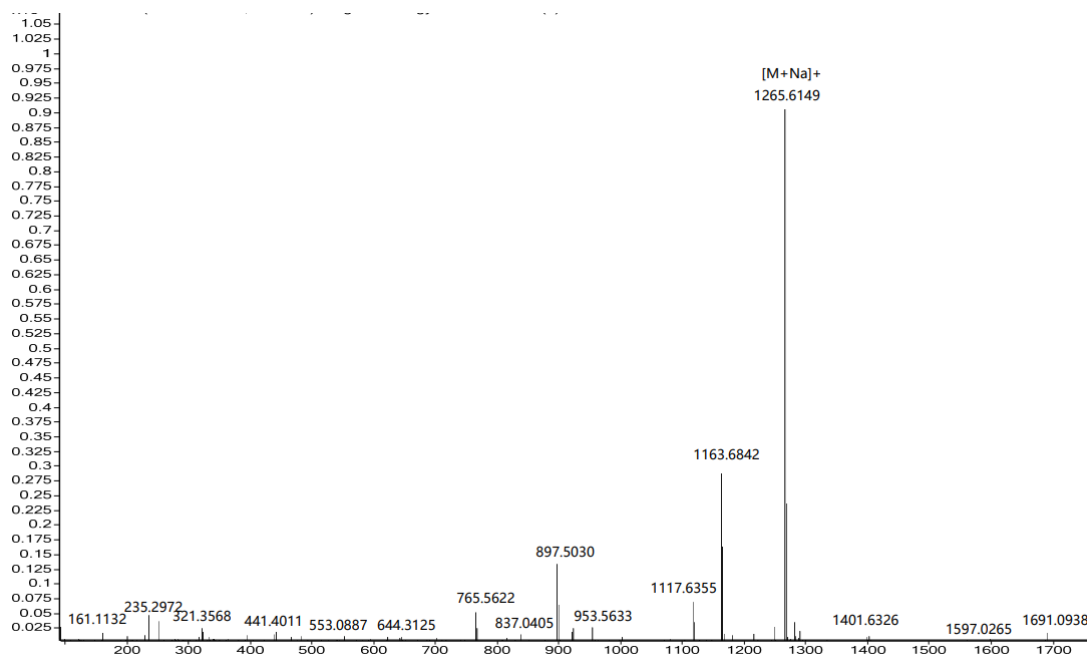

Figure S51. HRESI of 6

#### **Rudolph Research Analytical**

This sample was measured on an Autopol VI, Serial #91058  
Manufactured by Rudolph Research Analytical, Hackettstown, NJ, USA.

Measurement Date : Thursday, 27-FEB-2020

Set Temperature : OFF

Time Delay : Disabled

Delay between Measurement : Disabled

| <u>n</u> | <u>Average</u> | <u>Std.Dev.</u> | <u>% RSD</u> | <u>Maximum</u> | <u>Minimum</u> |
|----------|----------------|-----------------|--------------|----------------|----------------|
| 5        | 7.45           | 0.19            | 2.55         | 7.59           | 7.24           |

| <u>S.No</u> | <u>Sample ID</u> | <u>Time</u> | <u>Result</u> | <u>Scale</u> | <u>OR °Arc</u> | <u>WLG.nm</u> | <u>Lg.mm</u> | <u>Conc.g/100ml</u> | <u>Temp.</u> |
|-------------|------------------|-------------|---------------|--------------|----------------|---------------|--------------|---------------------|--------------|
| 1           | GY-41            | 03:50:27 PM | 7.59          | SR           | 0.022          | 589           | 100.00       | 0.290               | 22.7         |
| 2           | GY-41            | 03:50:33 PM | 7.24          | SR           | 0.021          | 589           | 100.00       | 0.290               | 22.7         |
| 3           | GY-41            | 03:50:39 PM | 7.24          | SR           | 0.021          | 589           | 100.00       | 0.290               | 22.7         |
| 4           | GY-41            | 03:50:45 PM | 7.59          | SR           | 0.022          | 589           | 100.00       | 0.290               | 22.7         |
| 5           | GY-41            | 03:50:50 PM | 7.59          | SR           | 0.022          | 589           | 100.00       | 0.290               | 22.7         |

Figure S52.  $[\alpha]_D^{23}$  of 6

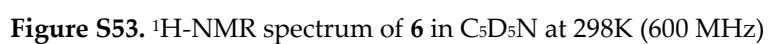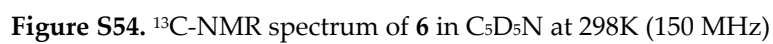

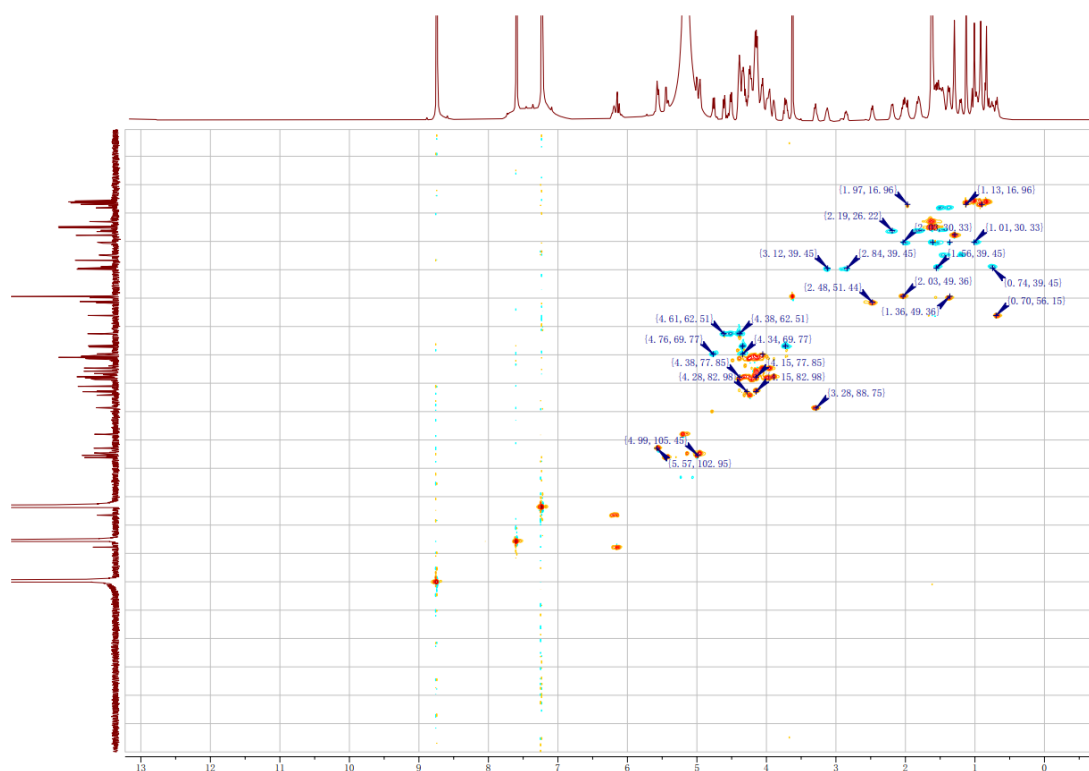

Figure S55. HSQC spectrum of **6** in C<sub>5</sub>D<sub>5</sub>N at 298K

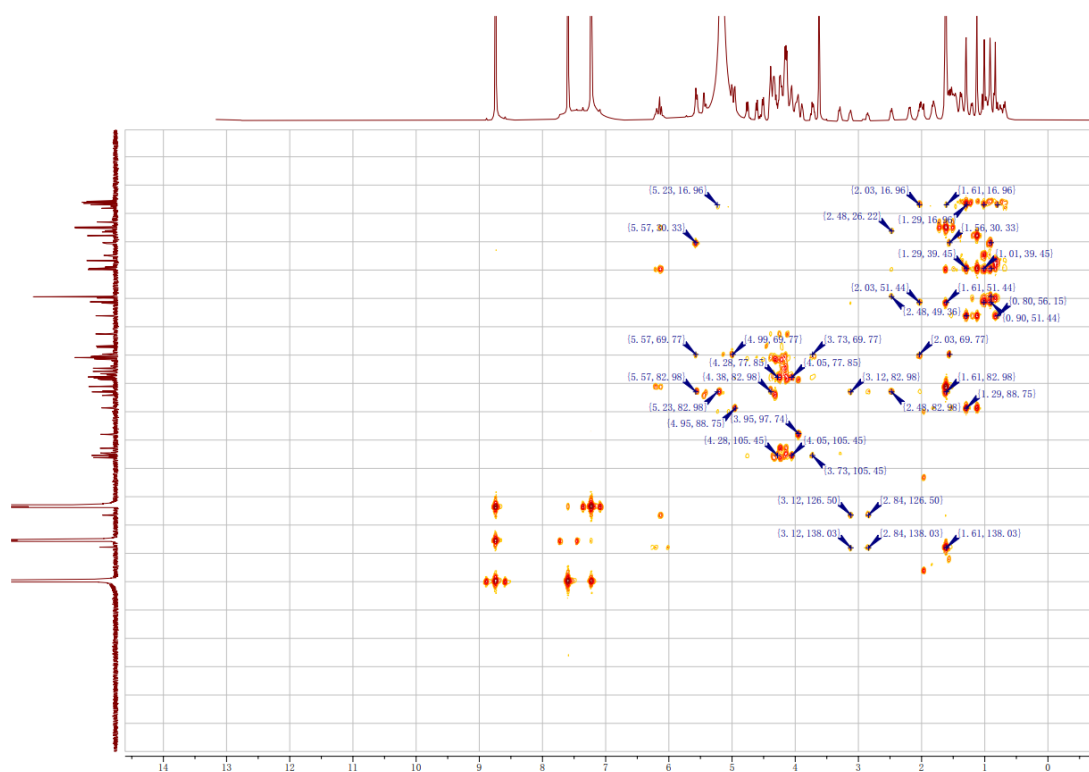

Figure S56. HMBC spectrum of **6** in C<sub>5</sub>D<sub>5</sub>N at 298K



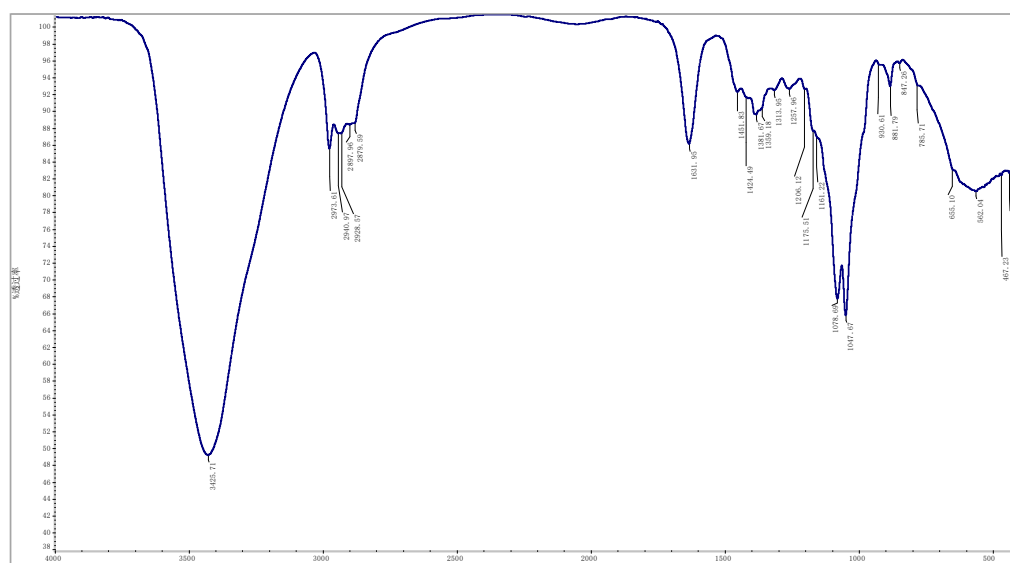

Figure S57. IR spectrum of 7

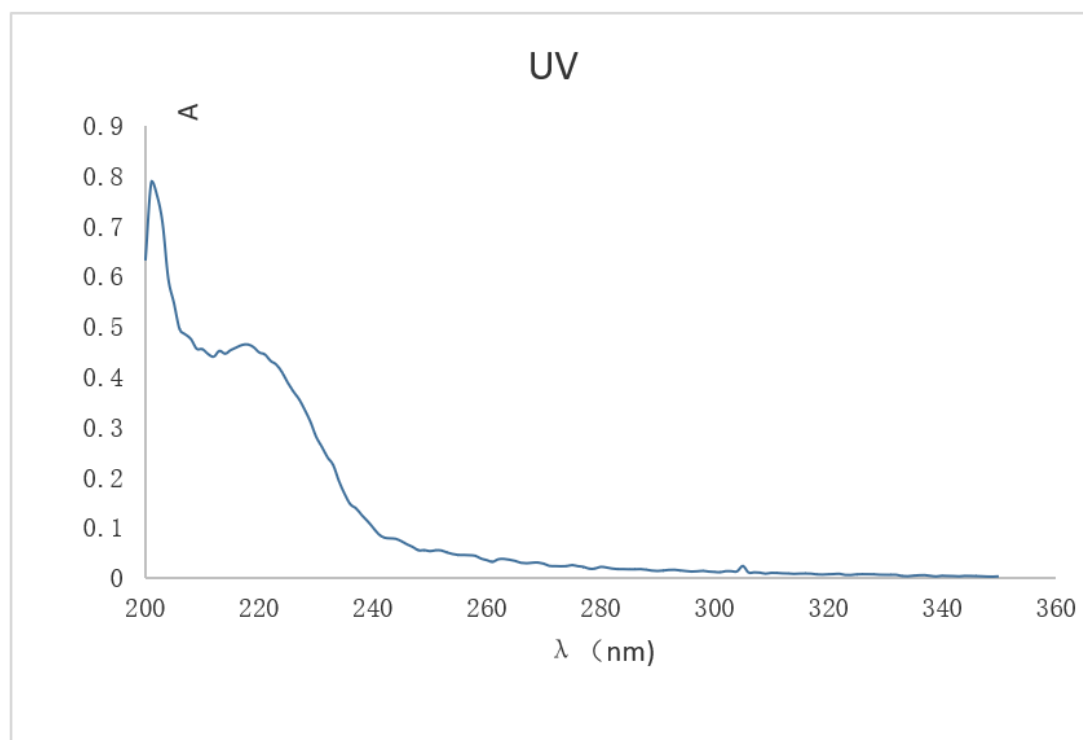

Figure S58. UV spectrum of 7

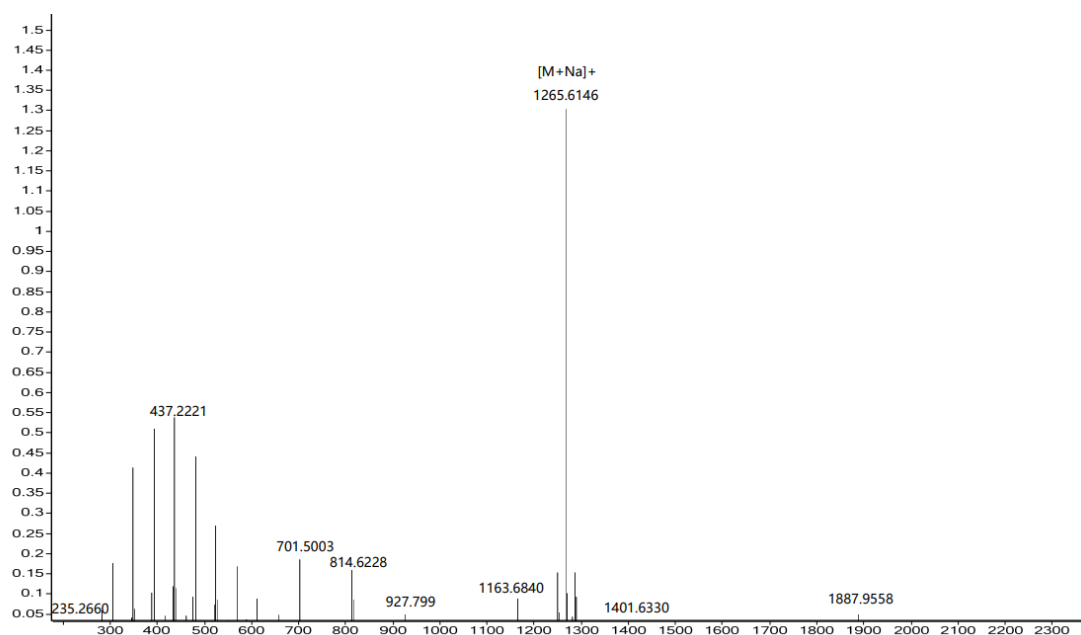

Figure S59. HRESI of 7

#### Rudolph Research Analytical

This sample was measured on an Autopol VI, Serial #91058  
Manufactured by Rudolph Research Analytical, Hackettstown, NJ, USA.

Measurement Date : Thursday, 27-FEB-2020

Set Temperature : OFF

Time Delay : Disabled

Delay between Measurement : Disabled

| <u>n</u>    | <u>Average</u>   | <u>Std.Dev.</u> | <u>% RSD</u>  | <u>Maximum</u> | <u>Minimum</u> |               |              |                     |              |  |
|-------------|------------------|-----------------|---------------|----------------|----------------|---------------|--------------|---------------------|--------------|--|
| 5           | 4.40             | 0.60            | 13.63         | 5.33           | 4.00           |               |              |                     |              |  |
| <u>S.No</u> | <u>Sample ID</u> | <u>Time</u>     | <u>Result</u> | <u>Scale</u>   | <u>OR °Arc</u> | <u>WLG.nm</u> | <u>Lg.mm</u> | <u>Conc.g/100ml</u> | <u>Temp.</u> |  |
| 1           | GY-39            | 03:06:11 PM     | 5.33          | SR             | 0.008          | 589           | 100.00       | 0.150               | 23.8         |  |
| 2           | GY-39            | 03:06:17 PM     | 4.67          | SR             | 0.007          | 589           | 100.00       | 0.150               | 23.8         |  |
| 3           | GY-39            | 03:06:23 PM     | 4.00          | SR             | 0.006          | 589           | 100.00       | 0.150               | 23.8         |  |
| 4           | GY-39            | 03:06:28 PM     | 4.00          | SR             | 0.006          | 589           | 100.00       | 0.150               | 23.8         |  |
| 5           | GY-39            | 03:06:34 PM     | 4.00          | SR             | 0.006          | 589           | 100.00       | 0.150               | 23.8         |  |

Figure S60.  $[\alpha]_D^{24}$  of 7

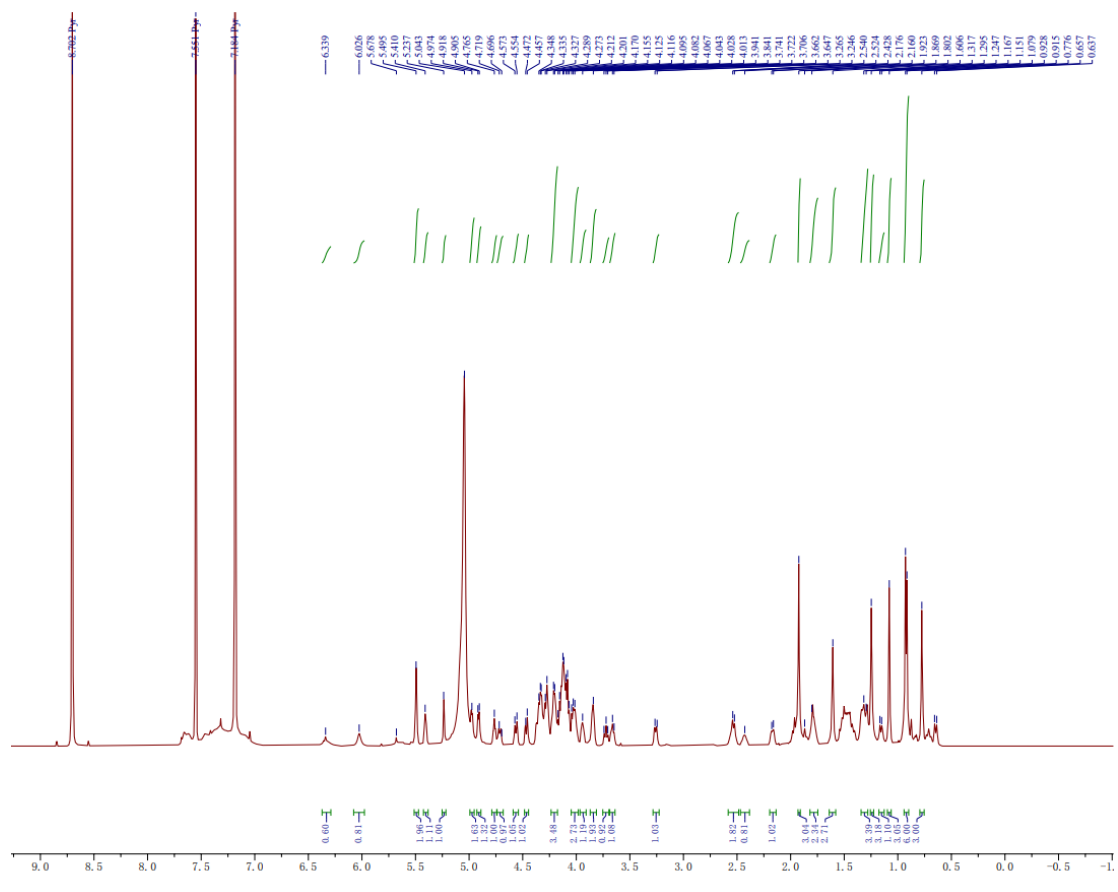

**Figure S61.**  $^1\text{H}$ -NMR spectrum of **7** in  $\text{C}_5\text{D}_5\text{N}$  at 298K (600 MHz)

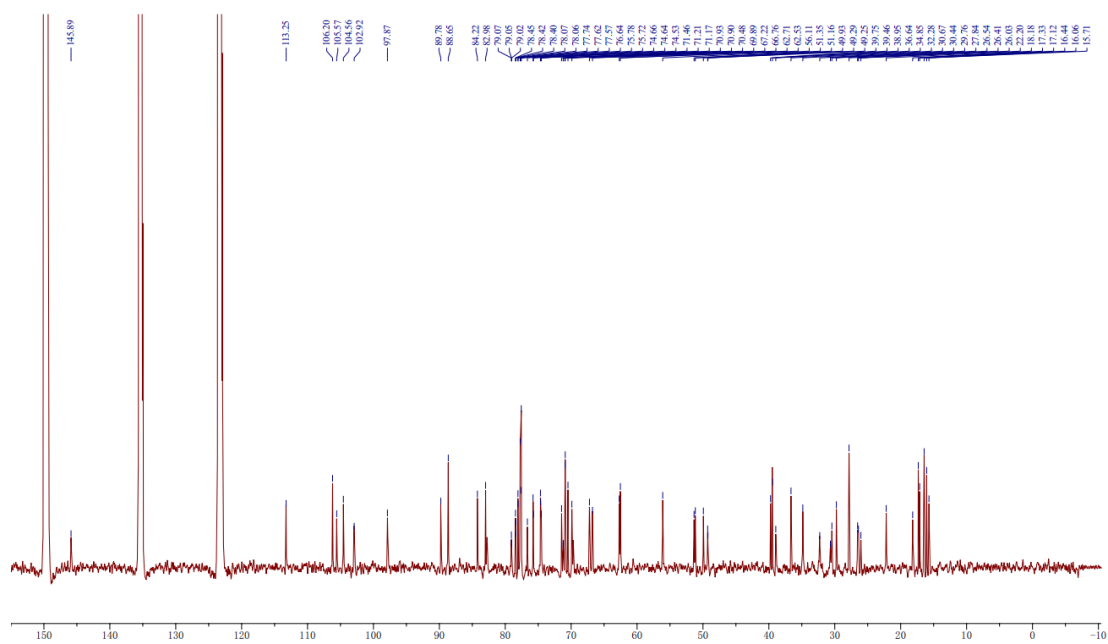

**Figure S62.**  $^{13}\text{C}$ -NMR spectrum of **7** in  $\text{C}_5\text{D}_5\text{N}$  at 298K (150 MHz)

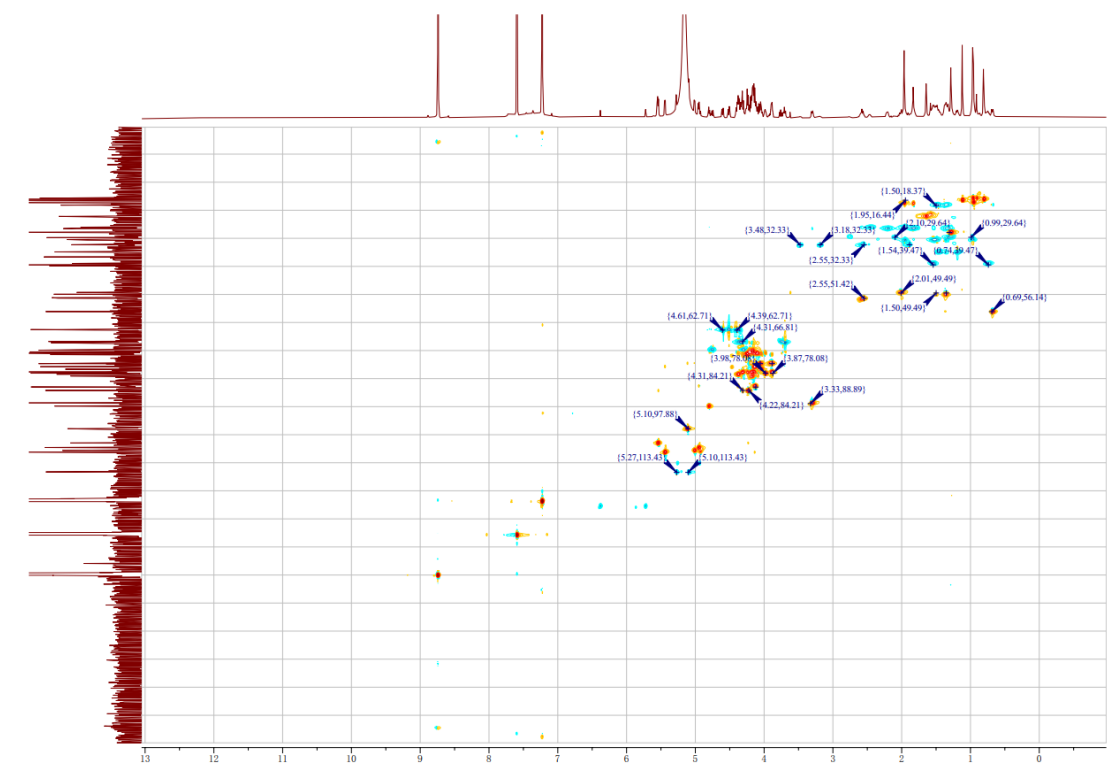

Figure S63. HSQC spectrum of 7 in C<sub>5</sub>D<sub>5</sub>N at 298K

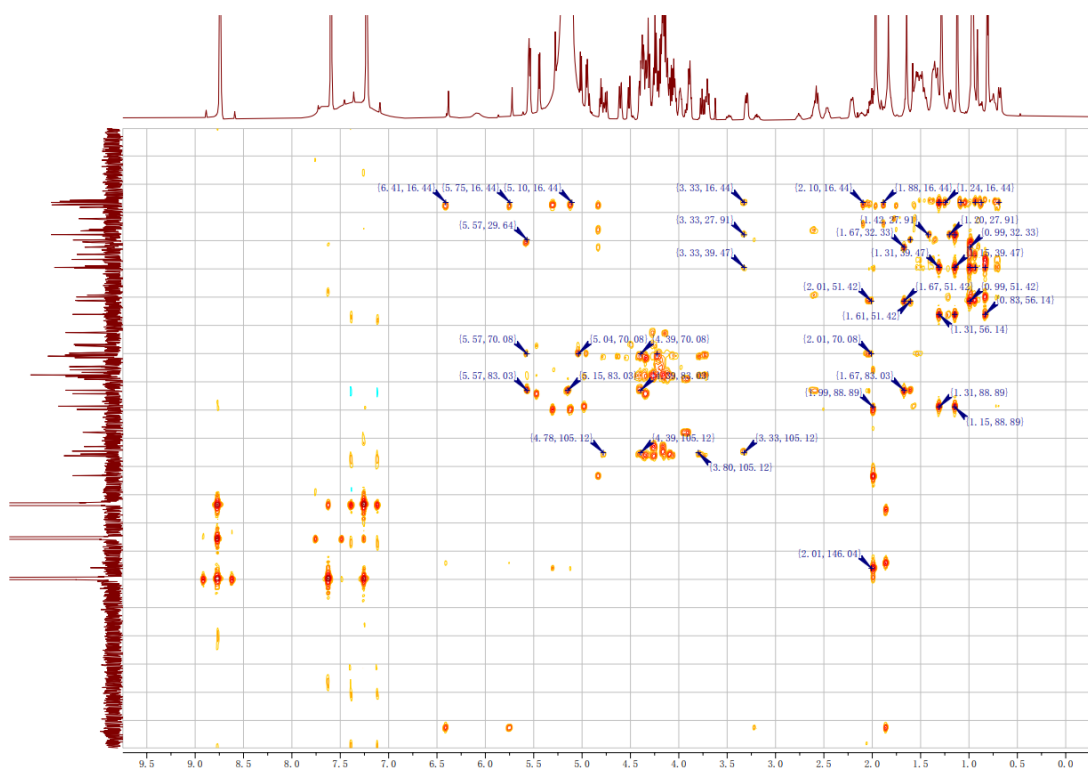

Figure S64. HMBC spectrum of 7 in C<sub>5</sub>D<sub>5</sub>N at 298K

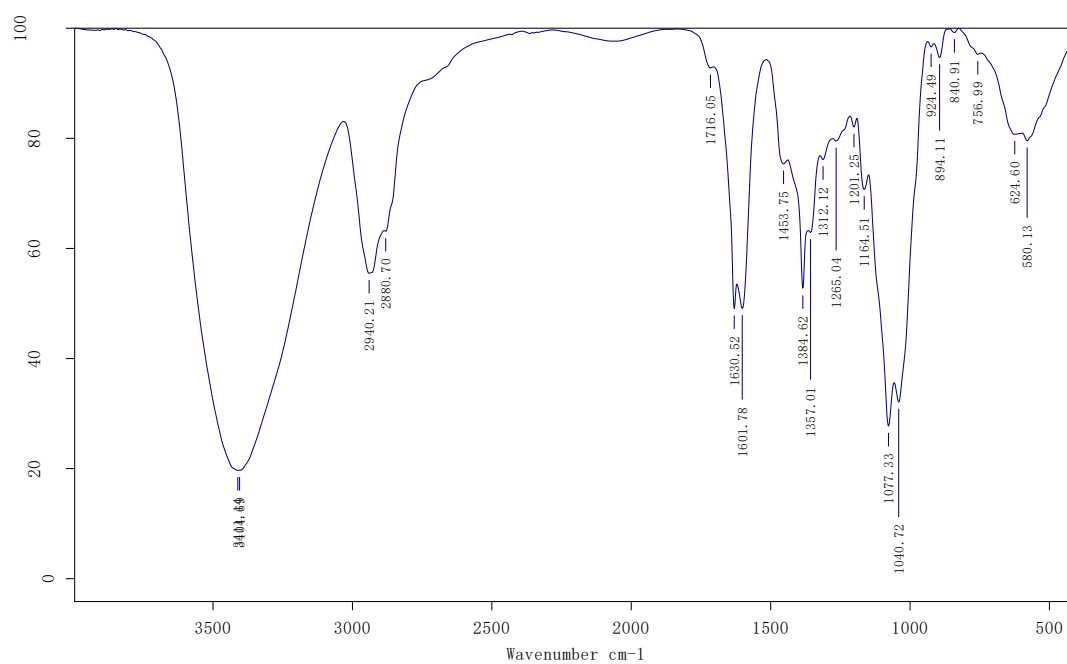

Figure S65. IR spectrum of 8

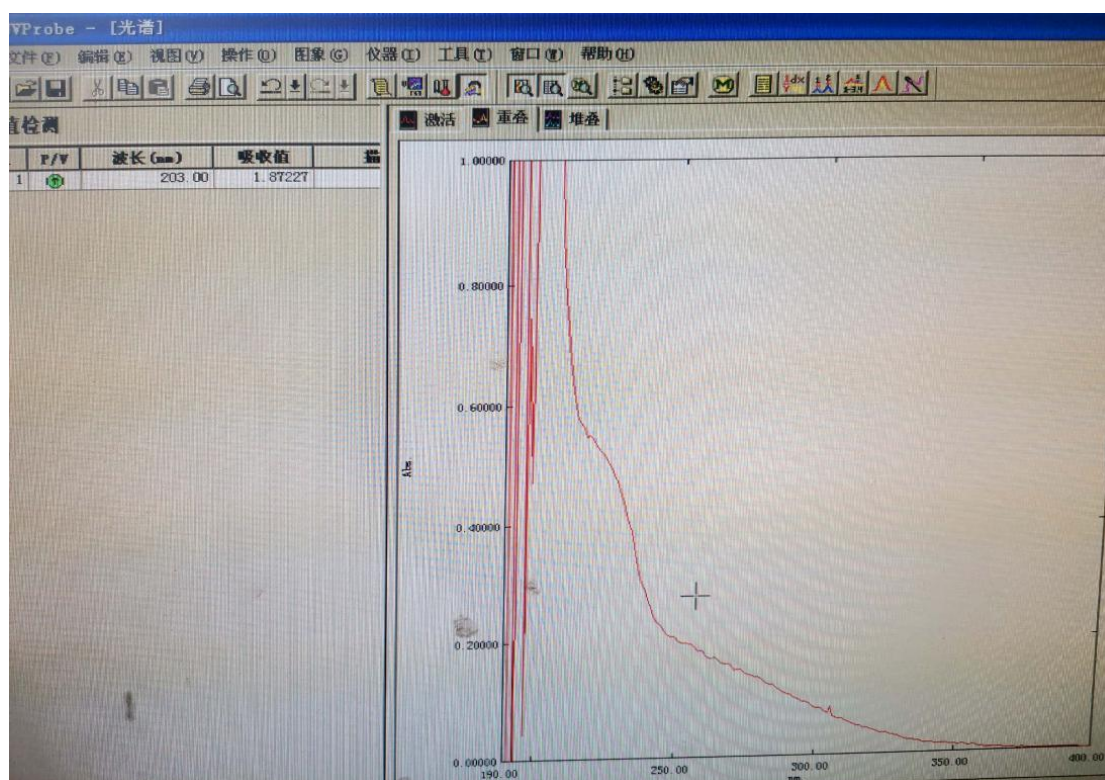

Figure S66. UV spectrum of 8

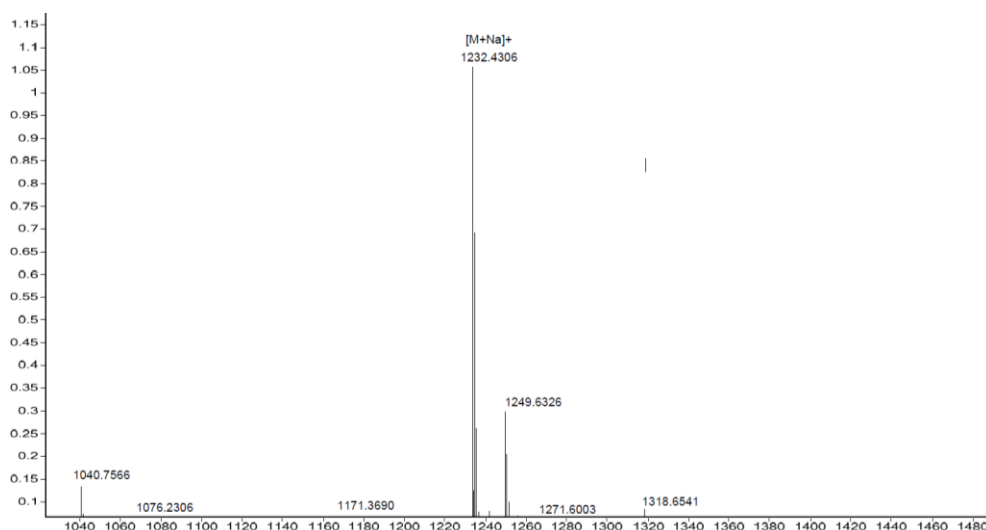

Figure S67. HRESI spectrum of 8

**Rudolph Research Analytical**

This sample was measured on an Autopol VI, Serial #91058  
Manufactured by Rudolph Research Analytical, Hackettstown, NJ, USA.

Measurement Date : Thursday, 27-FEB-2020

Set Temperature : OFF

Time Delay : Disabled

Delay between Measurement : Disabled

| <u>n</u>    | <u>Average</u>   | <u>Std.Dev.</u> | <u>% RSD</u>  | <u>Maximum</u> | <u>Minimum</u> |               |              |                     |              |  |
|-------------|------------------|-----------------|---------------|----------------|----------------|---------------|--------------|---------------------|--------------|--|
| 5           | -7.20            | 0.45            | -6.25         | -6.50          | -7.50          |               |              |                     |              |  |
| <u>S.No</u> | <u>Sample ID</u> | <u>Time</u>     | <u>Result</u> | <u>Scale</u>   | <u>OR °Arc</u> | <u>WLG.nm</u> | <u>Lg.mm</u> | <u>Conc.g/100ml</u> | <u>Temp.</u> |  |
| 1           | GY-29            | 03:01:01 PM     | -7.50         | SR             | -0.015         | 589           | 100.00       | 0.200               | 23.6         |  |
| 2           | GY-29            | 03:01:07 PM     | -7.50         | SR             | -0.015         | 589           | 100.00       | 0.200               | 23.6         |  |
| 3           | GY-29            | 03:01:13 PM     | -7.50         | SR             | -0.015         | 589           | 100.00       | 0.200               | 23.6         |  |
| 4           | GY-29            | 03:01:18 PM     | -6.50         | SR             | -0.013         | 589           | 100.00       | 0.200               | 23.6         |  |
| 5           | GY-29            | 03:01:24 PM     | -7.00         | SR             | -0.014         | 589           | 100.00       | 0.200               | 23.6         |  |

Figure S68.  $[\alpha]_D^{24}$  of 8

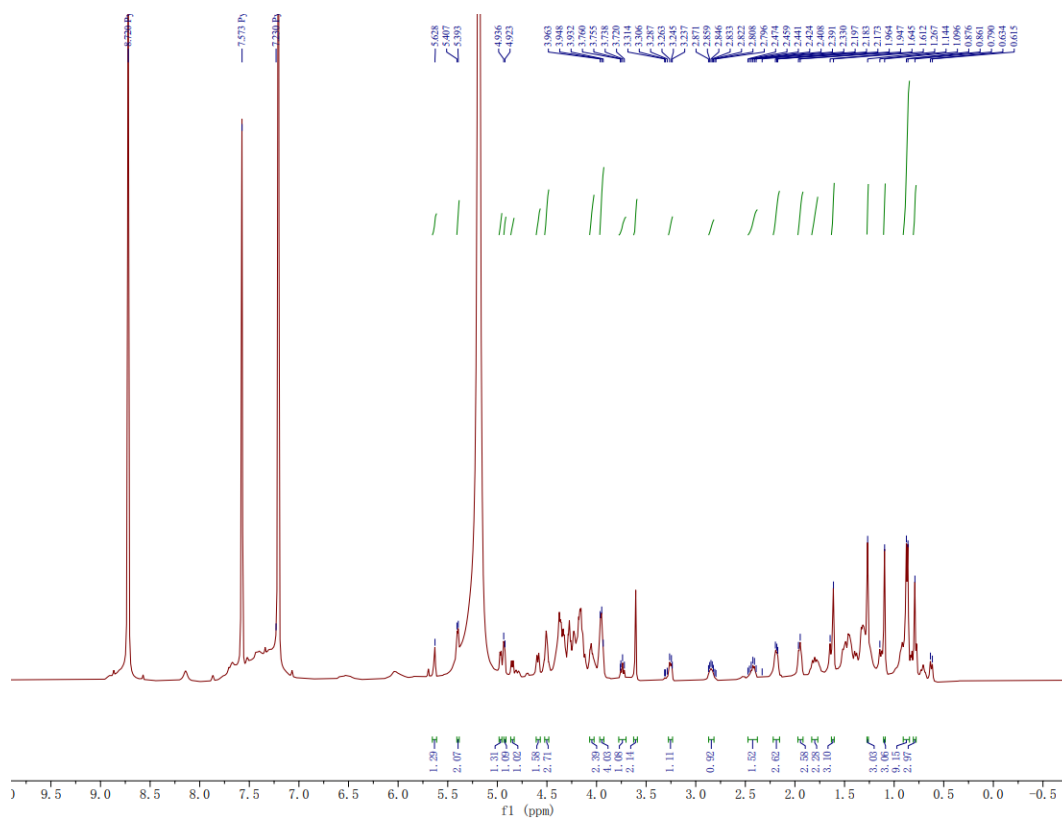

**Figure S69.** <sup>1</sup>H-NMR spectrum of 8 in C<sub>5</sub>D<sub>5</sub>N at 298K (600 MHz)

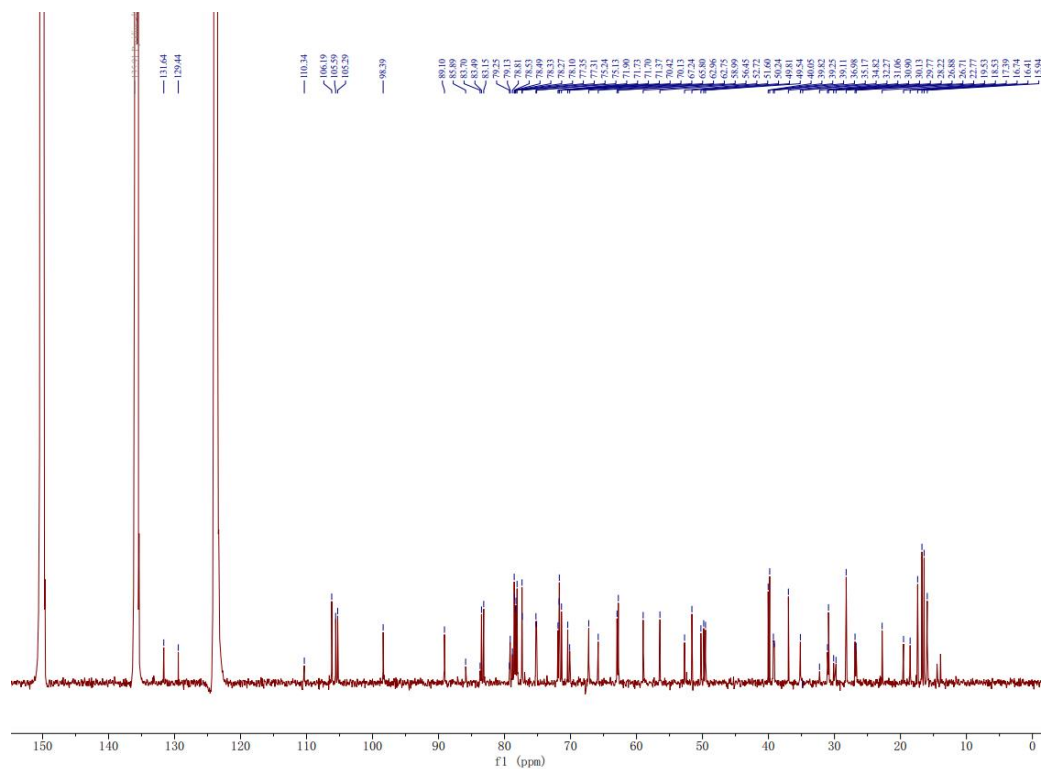

**Figure S70.** <sup>13</sup>C-NMR spectrum of 8 in C<sub>5</sub>D<sub>5</sub>N at 298K (150 MHz)

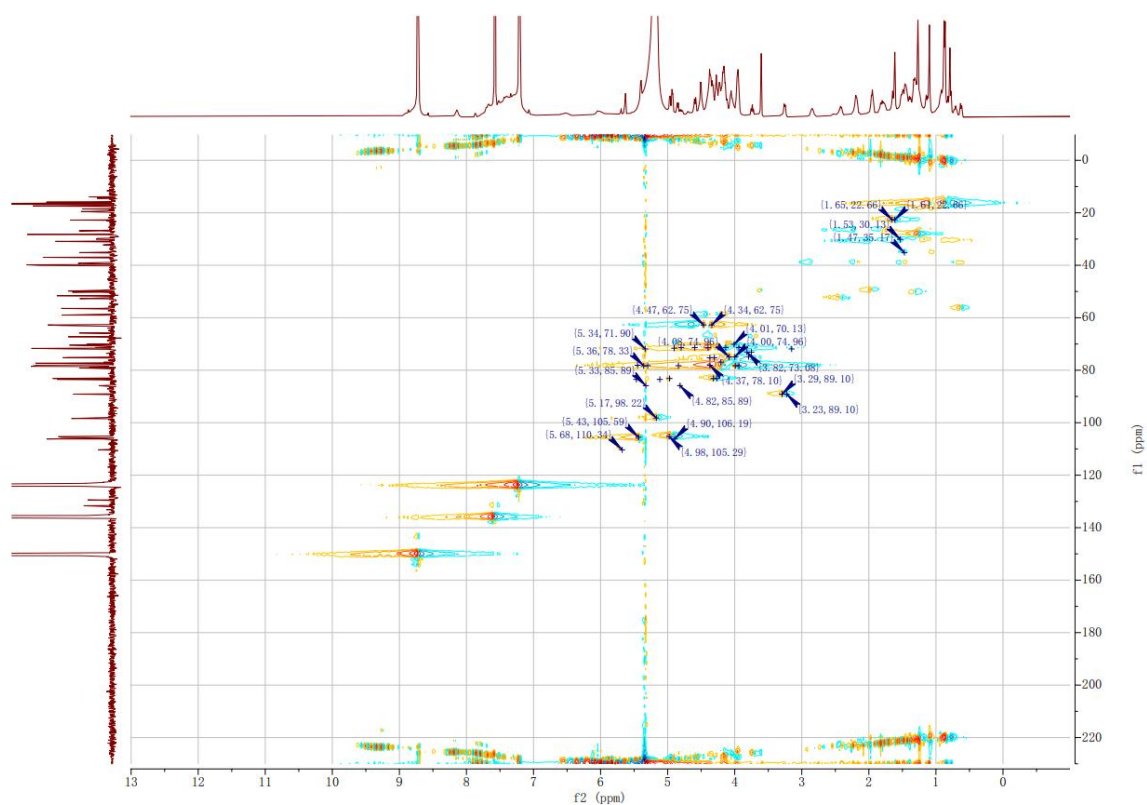

Figure. S71. HSQC spectrum of 8 in C<sub>5</sub>D<sub>5</sub>N at 298K

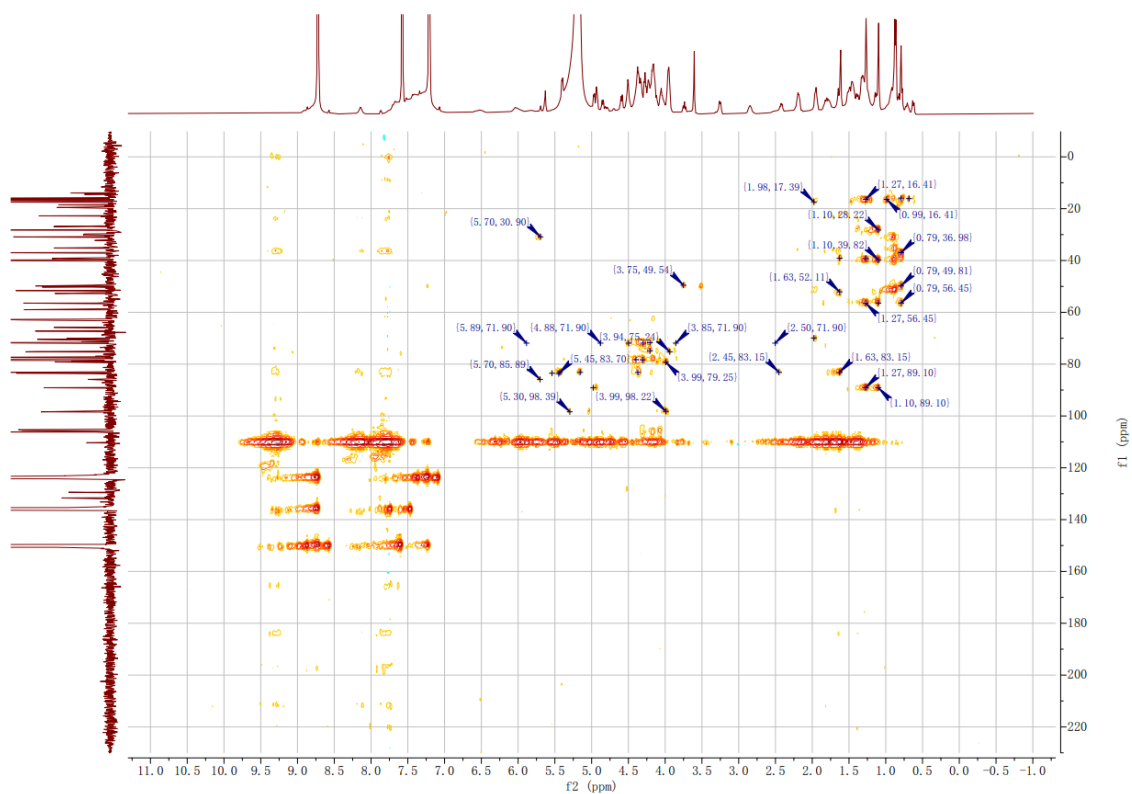

Figure S72. HMBC spectrum of 8 in C<sub>5</sub>D<sub>5</sub>N at 298K
